# Supplementary material for: Effects of dietary sodium and the DASH diet on the occurrence of headaches: results from randomised multicentre DASH-Sodium clinical trial
Source: PubMed Central journal article supplement — BMJ Open. 2014 Dec 11;4(12):e006671. doi: 10.1136/bmjopen-2014-006671 (PMC4265150; doi:10.1136/bmjopen-2014-006671), 2014-12-11
Supplement: bmjopen-2014-006671.draft_revisions.pdf [file bmjopen-2014-006671.draft_revisions.pdf]

# BMJ Open

## Effects of Dietary Sodium and the DASH Diet on the Occurrence of Headaches: Results from DASH-Sodium Trial

|                                 |                                                                                                                                                                                                         |
|---------------------------------|---------------------------------------------------------------------------------------------------------------------------------------------------------------------------------------------------------|
| Journal:                        | <i>BMJ Open</i>                                                                                                                                                                                         |
| Manuscript ID:                  | bmjopen-2014-006671                                                                                                                                                                                     |
| Article Type:                   | Research                                                                                                                                                                                                |
| Date Submitted by the Author:   | 18-Sep-2014                                                                                                                                                                                             |
| Complete List of Authors:       | Amer, Muhammad; Howard University Hospital, Medicine<br>Woodward, Mark; University of Oxford, Nuffield Department of Population Health<br>Appel, Lawrence; Johns Hopkins Medical Institutions, Medicine |
| <b>Primary Subject Heading</b>: | Epidemiology                                                                                                                                                                                            |
| Secondary Subject Heading:      | Evidence based practice, Public health                                                                                                                                                                  |
| Keywords:                       | Headache, Sodium, DASH-Sodium Trial                                                                                                                                                                     |
|                                 |                                                                                                                                                                                                         |

SCHOLARONE™  
Manuscripts

# Effects of Dietary Sodium and the DASH Diet on the Occurrence of Headaches: Results from DASH-Sodium Trial

**Muhammad Amer, Mark Woodward, Lawrence J. Appel**

## **Author's affiliation and address:**

### ***Muhammad Amer, MD, MHS, FACP***

Division of General Internal Medicine, Johns Hopkins University, 600 Wolfe St/ Osler 264  
Baltimore, MD 21287

Howard University Hospital, Georgia Ave, NW, Washington, DC, 20060

### ***Mark Woodward, PhD***

Nuffield Department of Population Health, University of Oxford, UK

Department of Epidemiology, Johns Hopkins Bloomberg School of Public Health, Baltimore, Maryland, USA.

George Institute for Global Health, University of Sydney, Australia

Welch Center for Prevention, 2024 E. Monument Street, Baltimore, Maryland, 21287, USA

### ***Lawrence J. Appel, MD, MPH***

Welch Center for Prevention, Epidemiology, and Clinical Research. Johns Hopkins Medical Institutions, Baltimore, Maryland. USA

Department of Medicine, Johns Hopkins University School of Medicine, Baltimore, Maryland

Department of Epidemiology, Johns Hopkins Bloomberg School of Public Health, Baltimore,

Welch Center for Prevention, 2024 E. Monument Street, Room 2-600, Baltimore, Maryland, 21287

USA

**Declaration of competing interests:** None reported by any author.

**Trial Registration:** ClinicalTrials.gov Identifier: NCT00000608

1 **Financial Disclosure:** Drs. Appel and Woodward were co-investigators in a trial sponsored by the  
2  
3  
4 McCormick Science Institute (completed in spring 2013).  
5  
6

7 **Corresponding author:**  
8

9 **Lawrence J. Appel, MD, MPH**  
10

11 Professor of Medicine, Epidemiology and International Health  
12

13 2024 East Monument Street  
14

15 Baltimore, MD 21287  
16

17 Office (410)-955-4156  
18

19 Fax (410) 955-0476  
20

21 lappel@jhmi.edu  
22  
23  
24  
25  
26  
27  
28  
29  
30  
31  
32  
33  
34  
35  
36  
37  
38  
39  
40  
41  
42  
43  
44  
45  
46  
47  
48  
49  
50  
51  
52  
53  
54  
55  
56  
57  
58  
59  
60

## Abstract

**Objectives:** Headaches are a common medical problem, yet few studies, particularly trials, have evaluated therapies that might prevent or control headaches. We, thus, investigated the effects on the occurrence of headaches of three levels of dietary sodium intake and two diet patterns [the Dietary Approaches to Stop Hypertension (DASH) diet (rich in fruits, vegetables, and low-fat dairy products with reduced saturated and total fat) and a control diet (typical of Western consumption patterns)].

**Design:** Randomized clinical trial.

**Setting:** Post-hoc analyses of the DASH-Sodium trial in the USA.

**Participants:** In a multicenter feeding study with three 30 day periods, 390 participants were randomized to the DASH or control diet. On their assigned diet, participants ate food with high sodium during one period, intermediate sodium during another period, and low sodium during another period, in random order.

**Outcome measures:** Occurrence and severity of headache were ascertained from self-administered questionnaires, completed at the end of each feeding period.

**Results:** The occurrence of headaches was similar in DASH vs. Control, at high [odds ratio (95% confidence interval) = 0.65 (0.37-1.12); p=0.12], intermediate [0.57 (0.29-1.12); p =0.10], and low [0.64 (0.36-1.13); p=0.12] sodium levels. By contrast, there was a lower risk of headache on the low, compared to high, sodium level, both on the control [0.69 (0.49 - 0.99); p = 0.05] and DASH [0.69 (0.49-0.98); p=0.04] diets.

1 **Conclusions:** A reduced sodium intake was associated with a significantly lower risk of headache,  
2  
3  
4 whilst dietary patterns had no effect on the risk of headaches in adults. Reduced dietary sodium intake  
5  
6 offers a novel approach to prevent headaches.  
7  
8  
9  
10

11 **Key words:** Headache; Sodium; Dietary Approaches to Stop Hypertension; DASH-Sodium trial  
12  
13  
14  
15  
16  
17  
18  
19  
20  
21  
22  
23  
24  
25  
26  
27  
28  
29  
30  
31  
32  
33  
34  
35  
36  
37  
38  
39  
40  
41  
42  
43  
44  
45  
46  
47  
48  
49  
50  
51  
52  
53  
54  
55  
56  
57  
58  
59  
60

For peer review only

## Strengths and limitations of this study

- Post-hoc analysis of a multicenter randomized clinical trial comparing effects of the two diet patterns using parallel design together with a three-period crossover of three levels of dietary sodium [high (150 mmol), intermediate (100 mmol), low (50 mmol)] on headaches in healthy adults with stage 1 hypertension.
- Three screening and two run-in feeding periods prior to randomization to assess participant's eligibility, compliance with dietary requirements and to estimate caloric requirements to maintain weight during study.
- Vigorous efforts made to promote adherence with assigned diets during feeding periods.
- Lack of information on the prevalence of headaches at baseline as well as type of self-reported headaches experienced by participants at the end of feeding periods.

## Introduction

Worldwide, headache is a common medical problem and amongst the most frequently reported disorders of the nervous system [1-3]. Globally, 46% of adults are estimated to have an active headache disorder (42% for tension-type headaches; 11% for migraines) [2, 4-6]. Headaches affect all age groups, with a higher prevalence in women compared to men [4-6]. The direct cost of health care services, and medications for the management of headache, is likewise substantial [7-11], as are indirect costs. Patients with frequent headaches have a poor quality of life and a higher number of days absent from work, compared with others [12-15]. Hence, successful strategies to prevent and treat headache would confer substantial benefits to afflicted individuals, as well as to society in general.

Available data support a direct association between blood pressure and the occurrence of headache [16-19]. Therefore, it is reasonable to speculate that dietary factors that lower blood pressure (e.g. reduced sodium intake and the DASH diet [20, 21]) might also reduce the occurrence of headache. However, evidence on the relationship of headaches with sodium intake and other dietary factors is sparse, with most attention focusing on the potential role of monosodium glutamate intake [22-24]. In the primary results paper of the DASH-Sodium trial, which focused on the blood pressure effects of the dietary interventions, the authors briefly comment on the occurrence of headaches in the broad context of side effects. They reported that the side effect of headache occurred in 47% of participants during the high, compared to 39 percent during the low, sodium feeding period [21]. In this paper, we expand on these preliminary observations.

## Methods

A detailed description of the rationale, design, and methods of the DASH-Sodium trial has been published [25]. Briefly, DASH-Sodium was a multicenter, randomized clinical trial, conducted between September 1997 and November 1999, designed to compare the effects on blood pressure of three levels of dietary sodium and two diet patterns. The study design incorporated a parallel, two-group, comparison of diet (DASH diet vs. control diet) together with a three-period crossover of the three levels of dietary sodium intake, with a primary outcome of mean systolic blood pressure (Figure 1). The three sodium levels were 1) "high" (150 mmol, at 2100 Kcal caloric intake), reflecting average consumption in the USA, 2) "intermediate" (100 mmol) reflecting the upper limit of current recommendations for adults [26], and 3) "low" (50 mmol). The DASH diet is rich in fruits, vegetables, and low-fat dairy products, high in dietary fiber, potassium, calcium and magnesium, moderately high in protein, and low in saturated fat, cholesterol, and total fat. The control diet is typical of what many in the Western world eat.

Study participants were 412 adults (age  $\geq 22$  years) with systolic blood pressure between 120 and 159 mm Hg and diastolic blood pressure between 80 and 95 mm Hg (i.e., pre-hypertension or stage 1 hypertension). Major exclusion criteria were diabetes mellitus, evidence of active malignancy, history of cardiovascular event (angina, myocardial infarction, angioplasty, or stroke), renal insufficiency (serum creatinine  $> 1.2$  mg/dL for females or 1.5 mg/dL for males), anemia (hematocrit at least 5 percent below normal range), pregnancy, inflammatory bowel disease, body mass index  $> 40$  kg/m<sup>2</sup>, use of antihypertensive drugs and corticosteroids, and consumption of more than 14 alcoholic beverages per week.



1  
2  
3  
4  
5  
6  
7  
8  
9  
10  
11  
12  
13  
14  
15  
16  
17  
18  
19  
20  
21  
22  
23  
24  
25  
26  
27  
28  
29  
30  
31  
32  
33  
34  
35  
36  
37  
38  
39  
40  
41  
42  
43  
44  
45  
46  
47  
48  
49  
50  
51  
52  
53  
54  
55  
56  
57  
58  
59  
60

Three screening visits (each separated by at least seven days) were conducted to assess general eligibility and to collect baseline data. Following the screening visits, eligible participants started a two-week run-in feeding period during which they ate the control diet at the high sodium level. The run-in feeding period was designed to exclude participants who were unlikely to comply with the dietary requirements and to estimate caloric requirements needed to maintain weight. Participants were then randomly assigned to one of the two diets using a parallel-group design, and ate each of three sodium levels (feeding periods) for 30 days each, in a randomized crossover design. Participants were not notified of their assigned dietary pattern or sodium sequence.

During feeding periods (run-in and intervention), participants were required to eat at least one meal per day on site at the clinical center, five days per week, and to take food home for other meals. Participants were expected to eat all of their food and were instructed to record the type and amount of any uneaten study food. Caffeinated beverages and alcohol were limited and monitored. Individual energy intake (calorie content) was adjusted so that each participant's weight during each feeding period remained stable.

Data collection staff were masked to randomized sodium and diet sequence. Measurements were obtained during screening and at the end of each feeding period. Blood pressure was measured in a seated position, using the right arm of participants. Twenty-four hour urine (for analysis of sodium, potassium, urea nitrogen, and creatinine) and body weight were also collected. Compliance with the feeding protocol was assessed by urinary excretion of sodium, potassium, phosphorus, urea nitrogen, and creatinine, estimated from 24 hour urine collections.

1 Symptoms (side effects) including headache, bloating, dry mouth, excessive thirst, fatigue or low  
2 energy, lightheadedness, nausea, and change in taste, were collected via self-administered questionnaires  
3  
4 (see Supplement) completed during the last seven days of each sodium feeding period. For each  
5  
6 symptom, potential responses were (1) "none" for not experiencing any symptom, (2) "mild" if symptom  
7  
8 occurred but did not interfere with usual activities, (3) "moderate" if symptom occurred and somewhat  
9  
10 interfered with usual activities, and (4) "severe" if participants were unable to perform usual activities  
11  
12 due to the symptom.  
13  
14  
15  
16  
17  
18  
19  
20  
21

22 This analysis of the DASH-Sodium trial included 390 (95%) of the 412 randomized participants.  
23  
24 Excluded participants were those with missing information on headaches in any of the 3 feeding periods.  
25  
26 For the primary analysis in this study, headache was defined as "any headache" (mild, moderate or  
27  
28 severe) during the last seven days of each feeding period. Subsequently, we report frequency of  
29  
30 headache by severity.  
31  
32  
33  
34  
35  
36  
37  
38

39 The means and proportions between groups were explored using t-tests and chi-square tests,  
40  
41 respectively. A non-parametric test was used for trends in the frequency of headache by sodium intake.  
42  
43 Since multiple observations were obtained on each participant, we used generalized estimating equation  
44  
45 models [27], with a logit link and binomial error and an exchangeable covariance structure, to model the  
46  
47 odds of a headache. Models were adjusted for age, sex, race, clinical site, systolic blood pressure, body  
48  
49 mass index, smoking status, and carryover effects from the previous period. To address the qualitative  
50  
51 consistency and benefit-hazard profiles between participants, subgroup analysis by diet stratified by age,  
52  
53 sex, race, obesity ( $\text{BMI} \geq 30 \text{ kg/m}^2$  v not) and hypertension (blood pressure  $\geq 140/90 \text{ mmHg}$  v not)  
54  
55  
56  
57  
58  
59  
60

1 status at baseline were also performed. Interactions between subgroups were tested by the addition of an  
2  
3 interaction term to the main effects model.  
4

5  
6  
7 Institutional review boards at the participating centers and an external data and safety monitoring  
8  
9 committee approved the trial protocol and consent procedures. Each participant provided written,  
10  
11 informed consent.  
12  
13

14  
15 A p-value of  $\leq 0.05$  was considered statistically significant. All analyses were performed using Stata  
16  
17 version 12.1 (Stata Corp LP, College Station, Texas, USA).  
18  
19  
20  
21  
22  
23  
24

## 25 **Results**

26  
27  
28 The 390 participants included in our analyses were those with completed symptoms questionnaires - 192  
29  
30 (94%) of the 204 participants assigned to the control diet and 198 (95%) of the 208 participants assigned  
31  
32 to the DASH diet. Clinical and demographic characteristics of the two groups were similar (Table 1).  
33  
34  
35  
36  
37  
38  
39  
40

41  
42 Figure 2 displays the distribution of headaches by sodium level and assigned diet. The highest  
43  
44 occurrence of headache was reported by participants on the control diet with high sodium (47%) and the  
45  
46 lowest by participants on the DASH diet with low sodium level (36%). On both diets, the number of  
47  
48 headaches reported was greatest for the high sodium level and least on the low sodium level.  
49  
50  
51  
52  
53  
54

55  
56 Among those assigned to the control diet, mean (SD) urinary sodium excretion was 141 (55), 106 (43)  
57  
58 and 64 (37) mmol per 24 hours during the high, intermediate, and low sodium feeding periods,  
59  
60

1  
2  
3  
4  
5  
6  
7  
8  
9  
10  
11  
12  
13  
14  
15  
16  
17  
18  
19  
20  
21  
22  
23  
24  
25  
26  
27  
28  
29  
30  
31  
32  
33  
34  
35  
36  
37  
38  
39  
40  
41  
42  
43  
44  
45  
46  
47  
48  
49  
50  
51  
52  
53  
54  
55  
56  
57  
58  
59  
60

respectively. In the DASH diet group, mean (SD) urinary sodium levels were 144 (57), 107 (52) and 67 (46) mmol per 24 hour during the high, intermediate, and low sodium feeding periods, respectively. On each sodium level, mean urinary sodium excretion was similar in those assigned to the two diets (each  $p > 0.05$ ). Mean urinary potassium and urea nitrogen were higher in the DASH diet group, reflecting the higher vegetable, dairy, and protein content of the DASH diet compared with the control diet, at each sodium level (Table 2).

Table 3 shows differences in the odds of headache by diet and sodium level. Compared to the high sodium level, we observed a lower odds of any headache during the low sodium period both on the control diet (adjusted OR: 0.69, 95% CI: 0.49-0.99) and the DASH diet (adjusted OR: 0.69, 95% CI: 0.49-0.98). Although the relationship appeared graded (Figure 2), there was no significant difference between the intermediate level of sodium and either the low or high sodium levels, on either diet. There was no significant association of diet pattern (DASH vs. Control) with headache on any sodium level. There was also no significant interaction between diet and sodium on the occurrence of headaches ( $p$ -interaction  $> 0.05$ ). Compared to the control diet with high sodium, there was a reduced risk of a headache on the DASH diet with low sodium (adjusted OR = 0.64, 95% CI: 0.41 – 0.99,  $p = 0.05$ ).

While on control diet, the number of persons who reported a severe headache was 4 (2.1%) during high, 1 (0.5%) during intermediate, and 1 (0.5%) during low sodium periods, respectively ( $p$  for trend = 0.13). On DASH diet, the corresponding number of persons who reported a severe headache was 8 (4%) during high, 2 (1%) during intermediate, and 3 (1.5%) during low sodium periods, respectively ( $p$  for

1 trend= 0.08). The frequency of severe headache was similar ( $p = 0.3$ ) by diet [DASH 8 (4%) and control  
2  
3  
4 4 (2%)] during high sodium feeding period. (Table 4)  
5  
6  
7  
8  
9

10  
11 There was no evidence that the relationship between sodium levels and headache was modified by age,  
12  
13 sex, race, baseline BMI or blood pressure (Figure 3).  
14  
15

## 16 17 18 19 20 **Discussion** 21

22  
23  
24 In this secondary analysis of the DASH-Sodium trial, which enrolled adults with pre- and stage 1  
25  
26 hypertension, a reduced dietary sodium intake was associated with a lower risk of headache, both on the  
27  
28 control diet and the DASH diet. In contrast, the risk of headache was similar on the DASH and control  
29  
30 diets.  
31  
32

33  
34  
35  
36  
37 The epidemiological literature on headaches in adults is limited [1, 2, 6]. However, it is well-recognized  
38  
39 that, compared to normotensive individuals, individuals with hypertension have a higher frequency of  
40  
41 headaches [16-19, 28]. Of note, Cooper *et al* reported a direct relationship of headaches with both  
42  
43 systolic and diastolic blood pressure [17]. As regards trials, in a pooled analysis that included seven  
44  
45 double-blinded, randomized placebo controlled trials of Ibesartan therapy, Hansson *et al* found a direct  
46  
47 relationship of diastolic blood pressure with incident headaches in 2673 patients with mild to moderate  
48  
49 hypertension [29].  
50  
51  
52  
53  
54  
55  
56  
57  
58  
59  
60

1 The association between dietary sodium intake and blood pressure is also well recognized [30, 31]. The  
2  
3 DASH diet alone and in combination with reduced sodium intake lowers blood pressure in patients with  
4  
5 or without hypertension [20, 21]. It is noteworthy that there was no significant relationship between diet  
6  
7 pattern and headache. This suggests that a process that is independent of a blood pressure may mediate  
8  
9 the relationship between sodium and headaches.  
10  
11  
12  
13  
14  
15  
16

17 Our results contrast with the popular belief that a diet rich in fruits, vegetables and potassium and low in  
18  
19 saturated and total fat may ease the frequency, or even prevent, headache [32]. Several dietary factors,  
20  
21 including fasting, alcoholic drinks, chocolate, coffee, and cheese, appear to trigger vascular headache  
22  
23 (cluster or migraine) in adults [33- 36]. In some studies, an increased intake of monosodium glutamate is  
24  
25 associated with the occurrence of headaches [22-24]. However, a recent review concluded that evidence  
26  
27 on the relationship of sodium glutamate intake and headaches is inconsistent [37]. In one study of 200  
28  
29 adults (mean age 37.7 years, 81% females), monosodium glutamate was identified as a trigger for  
30  
31 migraine headache in only 5 (2.5%) of study participants [36]. However, data on the relationship  
32  
33 between sodium intake and any form of headaches are sparse.  
34  
35  
36  
37  
38  
39  
40  
41  
42

43 The results of this study provide encouraging evidence in support of dietary recommendations to lower  
44  
45 sodium intake: recommendations which are currently based on the relationship of sodium intake with  
46  
47 blood pressure. The daily intake of sodium in adults living in the United States is already in excess of  
48  
49 their physiological need and for many individuals, is much higher than the highest level tested in this  
50  
51 study [38, 39]. Our results also support the recent World Health Organization guidelines for reducing  
52  
53 sodium intake to less than 87 mmol/day [40] and American Heart Association guidelines for reducing  
54  
55 sodium intake to 65 mmol/day [31].  
56  
57  
58  
59  
60

1  
2  
3  
4  
5 Strengths of our study include its randomized controlled design comparing two diets using a parallel  
6 design and a three-period crossover of three levels of dietary sodium (high, intermediate, and low).  
7  
8 Dietary intake during the feeding periods was closely monitored and vigorous efforts were made to  
9 promote adherence with assigned diets. The participants of this study were healthy, non-  
10 institutionalized, racially diverse, middle- and older-aged men and women. Hence we believe that these  
11 results are applicable to a large fraction of adults.  
12  
13  
14  
15  
16  
17  
18  
19  
20  
21  
22

23 Our study also has limitations. Information on the prevalence of headache at baseline from eligible  
24 participants was lacking. In addition, there was no information about the type of headache (tension,  
25 cluster or migraine) experienced by study participants. However, we suspect that most of the headaches  
26 were tension headaches. Whether a reduced sodium intake can prevent vascular headache is unknown.  
27  
28 Second, the instrument was administered just once in each feeding period and does not allow calculation  
29 of an event rate, such as person-days of headaches. Third, these are secondary, post-hoc analyses from a  
30 trial that was not explicitly designed to test the effects of dietary factors on headaches. Nonetheless, a  
31 rigorously controlled feeding study designed to test the effects of dietary factors on occurrence of  
32 headaches would be extremely expensive and logistically challenging. Fourth, our results likely  
33 underestimate the relationship of sodium intake with headaches. The range of sodium intake was  
34 relatively narrow - the highest sodium group in our trial actually corresponds to the average in the USA  
35 and is much lower than the intake in many countries, particularly in Asia. Self-report of symptoms is  
36 inherently imprecise and could bias results to the null, given that a validated instrument was not used for  
37 patient-reported headache.  
38  
39  
40  
41  
42  
43  
44  
45  
46  
47  
48  
49  
50  
51  
52  
53  
54  
55  
56  
57  
58  
59  
60

1  
2  
3  
4  
5 In conclusion, a reduced sodium intake was associated with significantly lower risk of headache, while  
6  
7 diet patterns had no effect on the risk of headaches. A reduced dietary sodium intake offers a novel  
8  
9 approach to prevent headache in adults. Additional studies are needed to replicate these findings and to  
10  
11 explore mechanisms that mediate the association between sodium intake and headache.  
12  
13  
14  
15  
16  
17  
18  
19  
20  
21  
22  
23  
24  
25  
26  
27  
28  
29  
30  
31  
32  
33  
34  
35  
36  
37  
38  
39  
40  
41  
42  
43  
44  
45  
46  
47  
48  
49  
50  
51  
52  
53  
54  
55  
56  
57  
58  
59  
60

For peer review only



1  
2  
3  
4  
5  
6  
7  
8  
9  
10  
11 **Contribution statement:** All three authors (Muhammad Amer, Mark Woodward, and Lawrence Appel)  
12  
13  
14 equally participated in the drafting and editing of the manuscript. Muhammad Amer, did analyses of  
15  
16 the data.  
17  
18

19  
20 **Competing interests:** None reported by any author  
21  
22

23 **Funding:** This study received no specific grant from any funding agency.  
24  
25

26 **Data sharing:** No additional data available to share.  
27  
28  
29  
30  
31  
32  
33  
34  
35  
36  
37  
38  
39  
40  
41  
42  
43  
44  
45  
46  
47  
48  
49  
50  
51  
52  
53  
54  
55  
56  
57  
58  
59  
60

## References

- 1- Benbir G, Karadeniz D, Göksan B. The characteristics and subtypes of headache in relation to age and gender in a rural community in Eastern Turkey. *Agri*. 2012 Oct; 24(4):145-52
- 2- Stovner Lj, Hagen K, Jensen R et al. The global burden of headache: a documentation of headache prevalence and disability worldwide. *Cephalalgia*. 2007 Mar; 27(3):193-210.
- 3- Andlin-Sobocki P, Jönsson B, Wittchen HU, Olesen J. Cost of disorders of the brain in Europe. *Eur J Neurol*. 2005 Jun; 12 Suppl 1:1-27
- 4- Jensen R, Stovner LJ. Epidemiology and comorbidity of headache. *Lancet Neurol*. 2008 Apr; 7(4):354-61.
- 5- Zwart JA, Dyb G, Holmen TL, Stovner LJ, Sand T. The prevalence of migraine and tension-type headaches among adolescents in Norway: The Nord- Trøndelag Health Study (Head-Hunt). *Cephalalgia*. 2004 May; 24(5):373-9
- 6- Rasmussen BK. Epidemiology of headache. *Cephalalgia*. 2001 Sep; 21(7):774-7.
- 7- Berg J, Stovner LJ. Cost of migraine and other headaches in Europe. *Eur J Neurol* 2005; 12 (suppl 1): 59–62.
- 8- Rasmussen BK, Jensen R, Olesen J. Impact of headache on sickness absence and utilisation of medical services: a Danish population study. *J Epidemiol Community Health* 1992; 46: 443–46
- 9- Lyngberg AC, Rasmussen BK, Jensen R, et al. Secular changes in health care utilization and work absence for migraine and tension type headache. A population based study. *J Epidemiol Com Health* 2005; 20: 1007–14.

- 1  
2  
3  
4  
5  
6  
7  
8  
9  
10  
11  
12  
13  
14  
15  
16  
17  
18  
19  
20  
21  
22  
23  
24  
25  
26  
27  
28  
29  
30  
31  
32  
33  
34  
35  
36  
37  
38  
39  
40  
41  
42  
43  
44  
45  
46  
47  
48  
49  
50  
51  
52  
53  
54  
55  
56  
57  
58  
59
- 10- Von Korff M, Stewart W, Lipton RB. Assessing headache severity: new directions. *Neurology* 1998; 44 (Suppl 4):40–6.
  - 11- Michel P, Dartiques J, Duru G, Moreau J, Salamon R, Henry P. Incremental absenteeism due to headache in migraine: results from the Mig-Access French National Cohort. *Cephalalgia*. 1999 Jun; 19(5):503-10.
  - 12- Vinding GR, Zeeberg P, Lyngberg A, Nielsen RT, Jensen R. The burden of headache in a patient population from a specialized headache centre. *Cephalalgia*. 2007 Mar; 27(3):263-70.
  - 13- Medizabel JE, Rothrock JF. An interregional comparative study of headache clinic populations. *Cephalalgia*. 1998 Jan; 18(1):57-9.
  - 14- Saper JR, Lake AE, Madden SF, Kreeger C. Comprehensive/tertiary care for headache: a 6-month outcome study. *Headache*. 1999 Apr; 39(4):249-63.
  - 15- Bussone G, Usai S, Grazzi L, Rigamonti A, Solari A, D'Amico D. Disability and quality of life in different primary headaches: results from Italian studies. *Neurol Sci*. 2004 Oct; 25 Suppl 3:S105-7.
  - 16- Kruszewski P, Bieniaszewski L, Neubauer J, Krupa-Wojciechowska B. Headache in patients with mild to moderate hypertension is generally not associated with simultaneous blood pressure elevation. *J Hypertens*. 2000 Apr; 18(4):437-44.
  - 17- Cooper WD, Glover DR, Hormbrey JM, Kimber GR. Headache and blood pressure: evidence of a close relationship. *J Hum Hypertens*. 1989 Feb; 3(1):41-4.
  - 18- Janeway TC. A clinical study of hypertensive cardiovascular disease. *Arch Intern Med*. 1913; 12: 755–798
  - 19- Barlow DH, Beevers DG, Hawthorne VM, Watt HD, Young GA. Blood pressure measurement at screening and in general practice. *Br Heart J*. 1977 Jan; 39(1):7-12.
  - 20- Appel LJ, Moore TJ, Obarzanek E et al. A clinical trial of the effects of dietary patterns on blood pressure. DASH Collaborative Research Group. *N Engl J Med*. 1997 Apr 17; 336(16):1117-24.

- 1  
2  
3  
4  
5  
6  
7  
8  
9  
10  
11  
12  
13  
14  
15  
16  
17  
18  
19  
20  
21  
22  
23  
24  
25  
26  
27  
28  
29  
30  
31  
32  
33  
34  
35  
36  
37  
38  
39  
40  
41  
42  
43  
44  
45  
46  
47  
48  
49  
50  
51  
52  
53  
54  
55  
56  
57  
58  
59  
60
- 21- Sacks FM, Svetkey LP, Vollmer WM et al; DASH-Sodium Collaborative Research Group. Effects on blood pressure of reduced dietary sodium and the Dietary Approaches to Stop Hypertension (DASH) diet. DASH-Sodium Collaborative Research Group. *N Engl J Med*. 2001 Jan 4;344(1):3-10
- 22- Yang WH, Drouin MA, Herbert M, Mao Y, Karsh J. The monosodium glutamate symptom complex: assessment in a double-blind, placebo-controlled, randomized study. *J Allergy Clin Immunol*. 1997 Jun; 99(6 Pt 1):757-62.
- 23- Randolph TG, Rollins JP. Beet sensitivity: allergic reactions from the ingestion of beet sugar (sucrose) and monosodium glutamate of beet origin. *J Lab Clin Med* 1950; 36:407-17.
- 24- Ratner D, Eshel E, Shoshani E. Adverse effects of monosodium glutamate: a diagnostic problem. *Israel J Med Sci* 1984;20:252-3
- 25- Svetkey LP, Sacks FM, Obarzanek E et al. The DASH Diet, Sodium Intake and Blood Pressure Trial (DASH-sodium): rationale and design. DASH-Sodium Collaborative Research Group. *J Am Diet Assoc*. 1999 Aug; 99(8 Suppl):S96-104.
- 26- The sixth report of the Joint National Committee on Prevention, Detection, Evaluation, and Treatment of High Blood Pressure. *Arch Intern Med* 1997; 157: 2413-46. [Erratum, *Arch Intern Med* 1998; 158:573.
- 27- Liang K-Y, Zeger SL. Longitudinal data analysis using generalized linear models. *Biometrika* 1986;73:13-22
- 28- Sigurdsson JA, Bengtsson C. Symptoms and signs in relation to blood pressure and antihypertensive treatment. A cross-sectional and longitudinal population study of middle-aged Swedish women. *Acta Med Scand*. 1983; 213(3):183-90.
- 29- Hansson L, Smith DH, Reeves R, Lapuerta P. Headache in mild-to-moderate hypertension and its reduction by irbesartan therapy. *Arch Intern Med*. 2000 Jun 12; 160 (11):1654-8.

- 1  
2  
3  
4  
5  
6  
7  
8  
9  
10  
11  
12  
13  
14  
15  
16  
17  
18  
19  
20  
21  
22  
23  
24  
25  
26  
27  
28  
29  
30  
31  
32  
33  
34  
35  
36  
37  
38  
39  
40  
41  
42  
43  
44  
45  
46  
47  
48  
49  
50  
51  
52  
53  
54  
55  
56  
57  
58  
59  
60
- 30- Aburto NJ, Ziolkovska A, Hooper L, Elliott P, Cappuccio FP, Meerpohl JJ. Effect of lower sodium intake on health: systematic review and meta-analyses. *BMJ*. 2013 Apr 3; 346:f1326.
- 31- Appel LJ, Brands MW, Daniels SR, Karanja N, Elmer PJ, Sacks FM; American Heart Association. Dietary approaches to prevent and treat hypertension: a scientific statement from the American Heart Association. *Hypertension*. 2006 Feb; 47(2):296-308.
- 32- Buchholz, David. *Heal Your Headache: The 1-2-3 Program for Taking Charge of Your Headaches*. New York: Workman, 2002.
- 33- Savi L, Rainero I, Valfrè W, Gentile S, Lo Giudice R, Pinessi L. Food and headache attacks. A comparison of patients with migraine and tension-type headache. *Panminerva Med*. 2002 Mar; 44(1):27-31.
- 34- Peatfield RC. Relationships between food, wine, and beer-precipitated migrainous headaches. *Headache*. 1995 Jun; 35(6):355-7.
- 35- Carod-Artal FJ, Ezpeleta D, Martín-Barriga ML, Guerrero AL. Triggers, symptoms, and treatment in two populations of migraineurs in Brazil and Spain. A cross-cultural study. *J Neurol Sci*. 2011 May 15; 304(1-2):25-8.
- 36- Fukui PT, Gonçalves TR, Strabelli CG et al. Trigger factors in migraine patients. *Arq Neuropsiquiatr*. 2008 Sep; 66(3A):494-9.
- 37- Freeman M. Reconsidering the effects of monosodium glutamate: a literature review. *J Am Acad Nurse Pract*. 2006 Oct; 18(10):482-6.
- 38- Brown IJ, Tzoulaki I, Candeias V, Elliott P. Salt intakes around the world: implications for public health. *Int J Epidemiol*. 2009 Jun; 38(3):791-813.
- 39- National Center for Chronic Disease Prevention and Health Promotion Division for Heart Disease and Stroke Prevention Fact sheet; [http://www.cdc.gov/salt/pdfs/Sodium\\_Fact\\_Sheet.pdf](http://www.cdc.gov/salt/pdfs/Sodium_Fact_Sheet.pdf). Accessed September 28, 2013.

1 40- WHO. Guideline: Sodium intake for adults and children. Geneva, World Health Organization  
2  
3  
4 (WHO), 2012.  
5  
6  
7  
8  
9  
10  
11  
12  
13

14 **FIGURE LEGEND:**

15  
16  
17  
18 **Figure 1:** DASH-Sodium Trial Flow Diagram  
19

20  
21 **Figure 2:** Frequency of headache by diet and sodium level.  
22  
23

24 **Figure 3**

25  
26  
27 **(a):** Odds of headache (low vs high sodium) by subgroup, in the DASH diet  
28  
29

30 **(b):** Odds of headache (low vs high sodium) by subgroup, in the Control diet  
31  
32  
33  
34  
35  
36  
37  
38  
39  
40  
41  
42  
43  
44  
45  
46  
47  
48  
49  
50  
51  
52  
53  
54  
55  
56  
57  
58  
59  
60

**Table 1: Baseline characteristics of participants in DASH-Sodium trial**  
**[Number (percentage) or mean (standard deviation)]**

| <b>Characteristic</b>                 | <b>Control<br/>Diet<br/>(n=192)</b> | <b>DASH<br/>Diet<br/>(n=198)</b> | <b>Total<br/>(n=390)</b> |
|---------------------------------------|-------------------------------------|----------------------------------|--------------------------|
| Age (years)                           | 49 (10)                             | 47 (10)                          | 48 (10)                  |
| Females, n (%)                        | 104 (54)                            | 118 (60)                         | 222 (57)                 |
| Race, n (%)                           |                                     |                                  |                          |
| Caucasian                             | 78 (41)                             | 81 (41)                          | 159 (41)                 |
| African American                      | 109 (57)                            | 114 (57)                         | 223 (57)                 |
| Other                                 | 5 (3)                               | 3 (2)                            | 8 (2)                    |
| Body Mass Index, (kg/m <sup>2</sup> ) | 30 (5)                              | 29 (5)                           | 29.2 (5)                 |
| Systolic Blood Pressure (mm Hg)       | 135 (9)                             | 134 (9)                          | 135 (9)                  |
| Diastolic Blood Pressure (mm Hg)      | 86 (4)                              | 85 (5)                           | 86 (4)                   |
| Hypertension, n (%) †                 | 76 (40)                             | 79 (40)                          | 155 (40)                 |
| Current Smoker, n (%)                 | 21 (11)                             | 21 (11)                          | 42 (11)                  |

†Hypertension was defined as an average systolic blood pressure of 140 mm of Hg or an average diastolic blood pressure of 90 mmHg during the three screening visits.

**Table 2: Urinary excretion according to sodium level and diet**  
**[Mean (standard deviation)]**

|                      | Level of sodium |                    |                 |                    |                 |                    |
|----------------------|-----------------|--------------------|-----------------|--------------------|-----------------|--------------------|
|                      | High            |                    | Intermediate    |                    | Low             |                    |
|                      | DASH<br>(n=198) | Control<br>(n=192) | DASH<br>(n=198) | Control<br>(n=192) | DASH<br>(n=198) | Control<br>(n=192) |
| <b>Sodium</b>        |                 |                    |                 |                    |                 |                    |
| gram/day             | 3.3 (1.3)       | 3.2 (1.3)          | 2.5 (1.2)       | 2.4 (0.9)          | 1.5 (1.1)       | 1.5 (0.8)          |
| mmol/day             | 144 (57)        | 141 (55)           | 107 (52)        | 106 (43)           | 67 (46)         | 64 (37)            |
| <b>Potassium</b>     |                 |                    |                 |                    |                 |                    |
| gram/day             | 3.0 (1.1)       | 1.6 (0.5)          | 3.2 (1.2)       | 1.6 (0.5)          | 3.2 (1.1)       | 1.6 (0.5)          |
| mmol/day             | 76 (27)         | 40 (14)            | 82 (31)         | 41 (14)            | 81 (29)         | 41 (14)            |
| <b>Urea Nitrogen</b> |                 |                    |                 |                    |                 |                    |
| gram/day             | 11.5 (4)        | 9.5 (3.2)          | 12.4 (4.5)      | 9.7 (3.4)          | 12 (4)          | 10 (3.3)           |
| <b>Creatinine</b>    |                 |                    |                 |                    |                 |                    |
| gram/day             | 1.4 (0.5)       | 1.5 (0.5)          | 1.5 (0.6)       | 1.5 (0.6)          | 1.4 (0.5)       | 1.5 (0.6)          |



Table 3: Odds ratio of headaches by diet and sodium sequence

|                                                                   | Odds ratio (95 %CI) | p value |
|-------------------------------------------------------------------|---------------------|---------|
| <b><i>Sodium effects on the DASH diet</i></b>                     |                     |         |
| Intermediate v high sodium                                        | 0.72 (0.51-1.01)    | 0.06    |
| Low v intermediate sodium                                         | 0.96 (0.68-1.37)    | 0.85    |
| Low v high sodium                                                 | 0.69 (0.49-0.98)    | 0.04    |
| <b><i>Sodium effects on the control diet</i></b>                  |                     |         |
| Intermediate v high sodium                                        | 0.81 (0.57-1.15)    | 0.24    |
| Low v intermediate sodium                                         | 0.86 (0.59-1.24)    | 0.42    |
| Low v high sodium                                                 | 0.69 (0.49-0.99)    | 0.05    |
| <b><i>Diet effects (DASH vs Control) at each sodium level</i></b> |                     |         |
| On high sodium                                                    | 0.65 (0.37-1.12)    | 0.12    |
| On intermediate sodium                                            | 0.57 (0.29-1.12)    | 0.10    |
| On low sodium                                                     | 0.64 (0.36-1.13)    | 0.12    |
| <b><i>Low Sodium on DASH vs High Sodium on Control</i></b>        | 0.64 (0.14-0.99)    | 0.05    |

Models adjusted for age, sex, race, site, systolic blood pressure, BMI, smoking status and carry over effects from the previous period. CI =confidence interval.

Table 4: Occurrence and severity of headache by sodium level and diet, n (%)

|                 | Level of sodium |                    |                 |                    |                 |                    |
|-----------------|-----------------|--------------------|-----------------|--------------------|-----------------|--------------------|
|                 | High            |                    | Intermediate    |                    | Low             |                    |
|                 | DASH<br>(n=198) | Control<br>(n=192) | DASH<br>(n=198) | Control<br>(n=192) | DASH<br>(n=198) | Control<br>(n=192) |
| <b>Mild</b>     | 60 (30)         | 70 (36)            | 43 (22)         | 62 (32)            | 53 (27)         | 53 (28)            |
| <b>Moderate</b> | 17 (9)          | 17 (9)             | 31 (16)         | 16 (8)             | 16 (8)          | 21 (11)            |
| <b>Severe</b>   | 8 (4)           | 4 (2)              | 2 (1)           | 1 (0.5)            | 3 (1)           | 1 (0.5)            |

**Figure 1: DASH-Sodium Trial Flow Diagram**

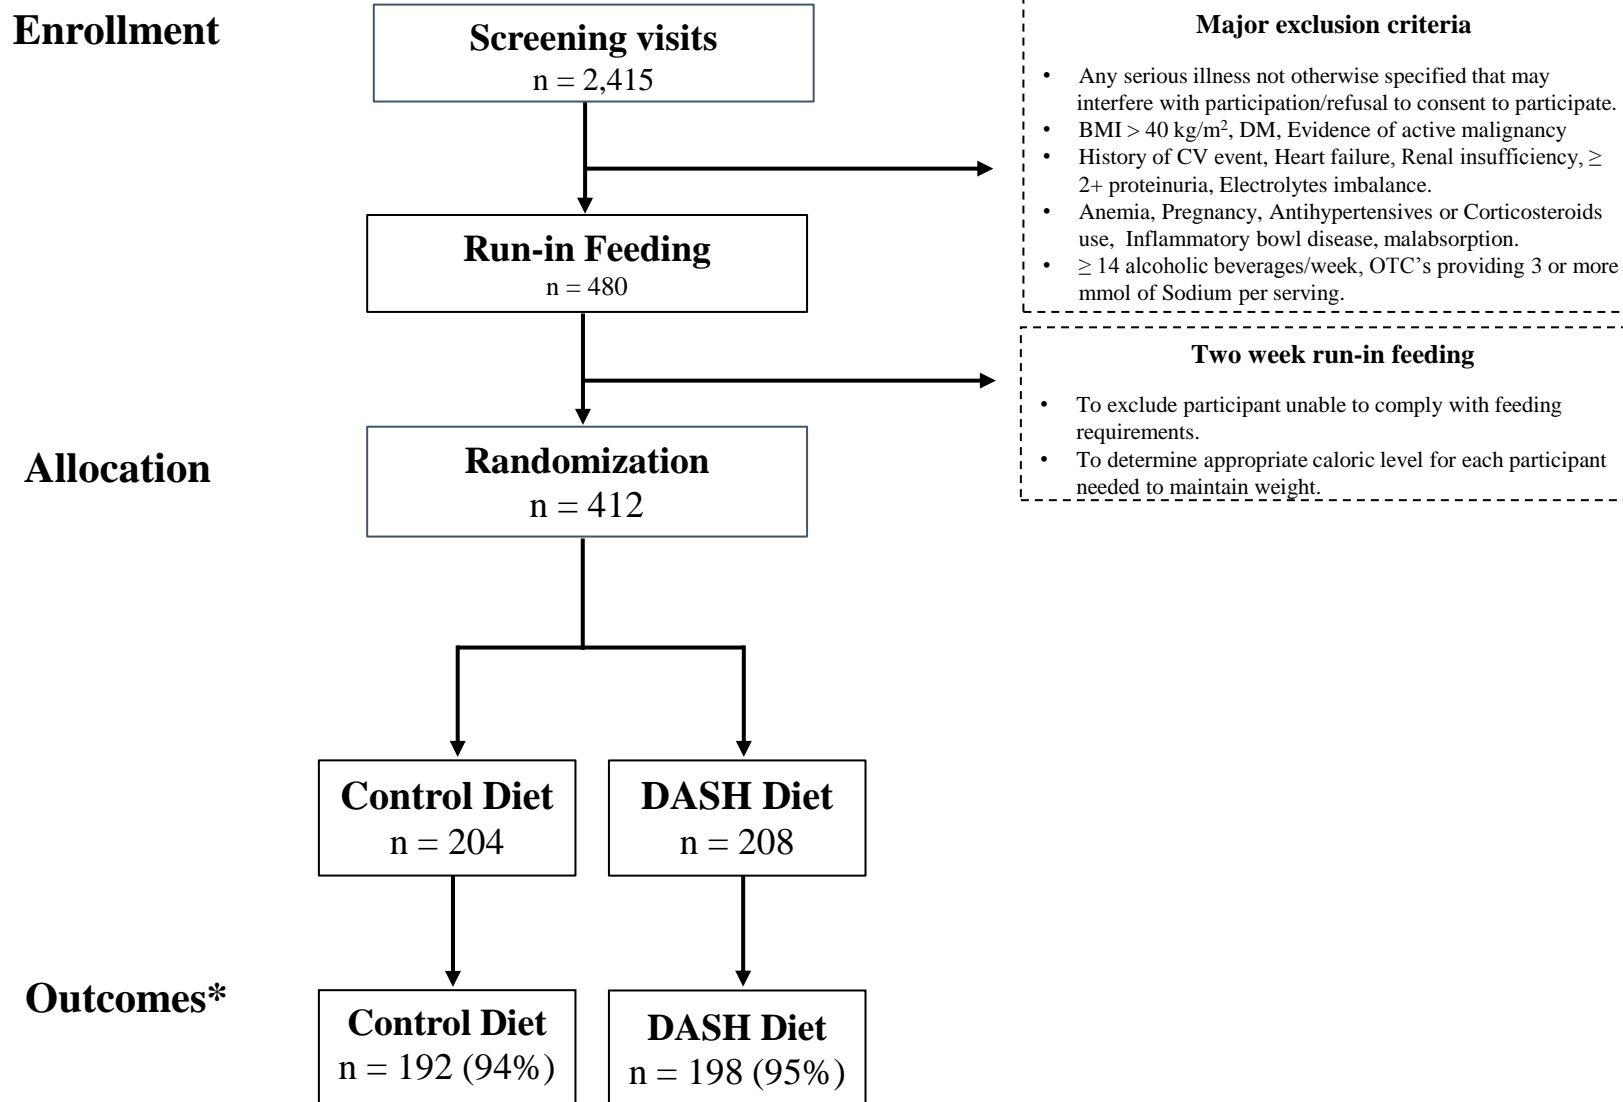

For peer review only - <http://bmjopen.bmj.com/site/about/guidelines.xhtml>

\*Participants with complete questionnaire data on headaches in all 3 periods.

1  
2  
3  
4  
5  
6  
7  
8  
9  
10  
11  
12  
13  
14  
15  
16  
17  
18  
19  
20  
21  
22  
23  
24  
25  
26  
27  
28  
29  
30  
31  
32  
33  
34  
35  
36  
37  
38  
39  
40  
41  
42

1  
2  
3  
4  
5  
6  
7  
8  
9  
10  
11  
12  
13  
14  
15  
16  
17  
18  
19  
20  
21  
22  
23  
24  
25  
26  
27  
28  
29  
30  
31  
32  
33  
34  
35  
36  
37  
38  
39  
40  
41  
42  
43

**Figure 2: Frequency of headache by diet and sodium level**

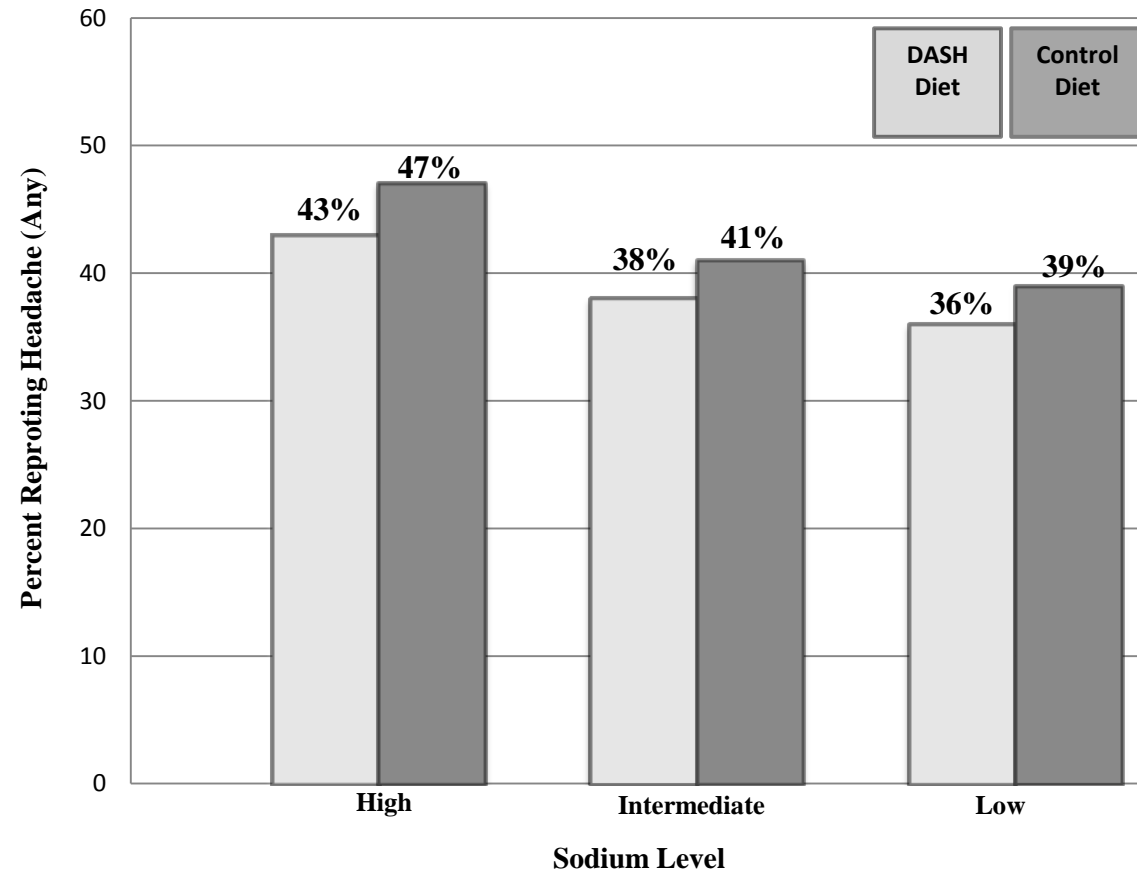

Figure 3 (a): Odds of headache (low vs high sodium) by subgroup, in DASH diet

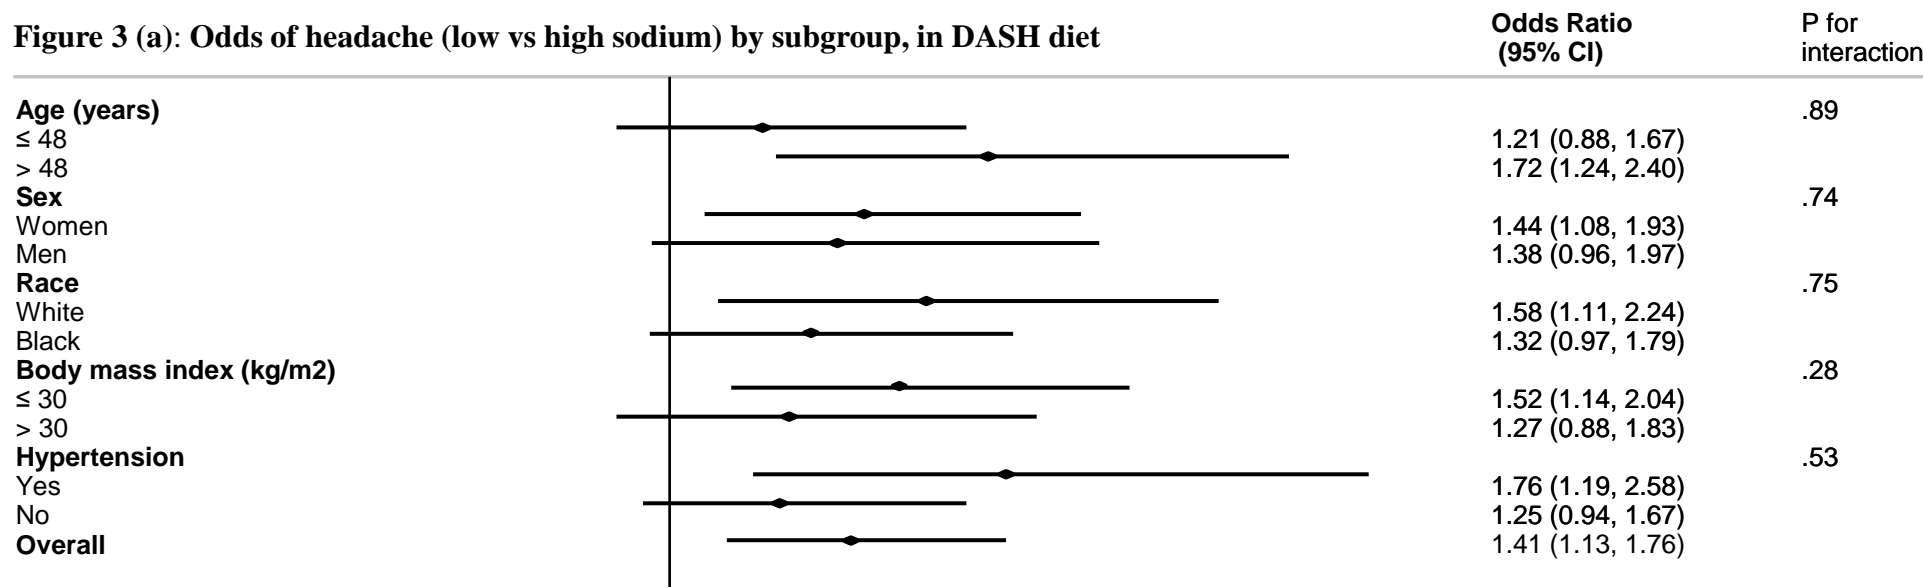

Figure 3 (b): Odds of headache (low vs high sodium) by subgroup, in Control diet

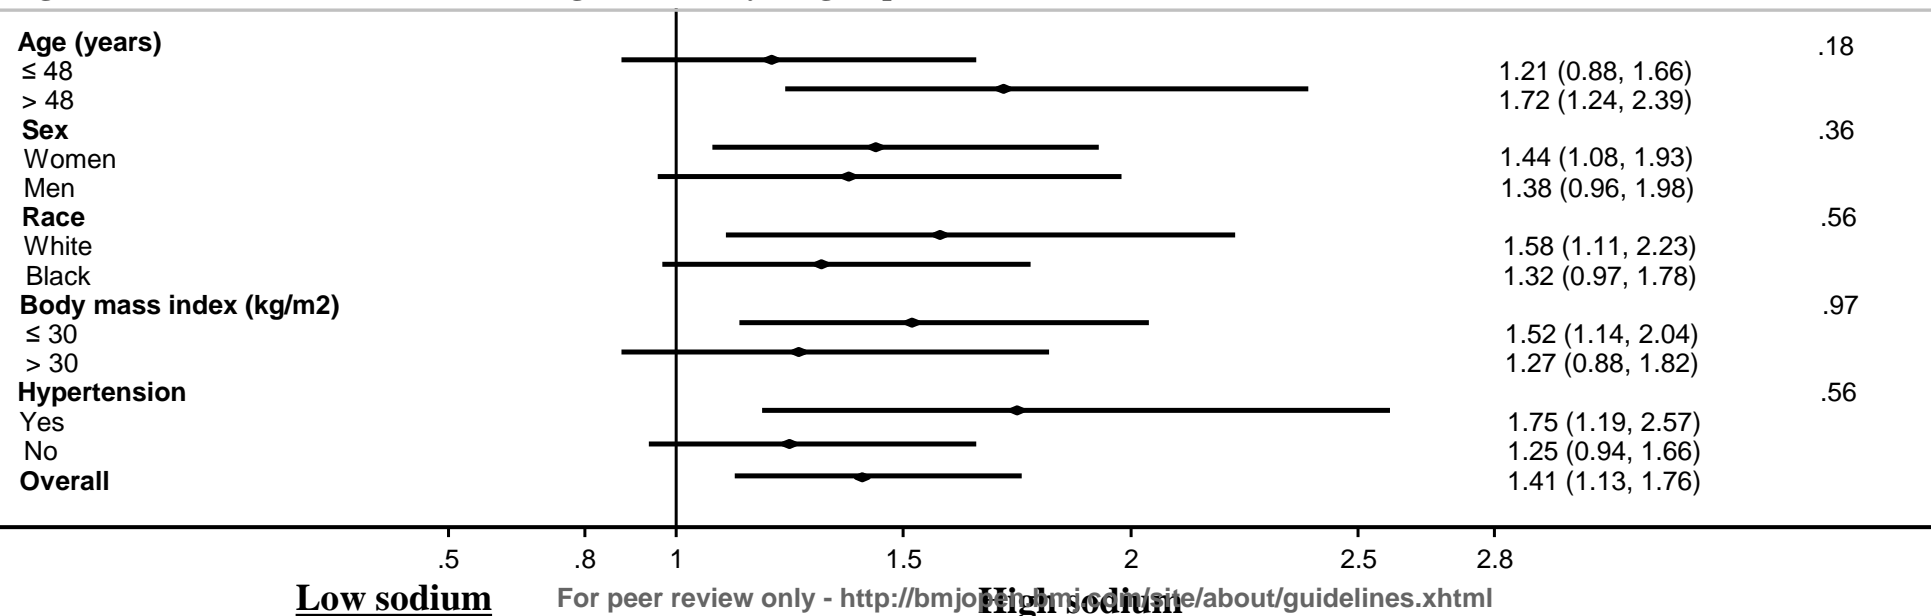

Low sodium

High sodium

# BMJ Open

## Effects of Dietary Sodium and the DASH Diet on the Occurrence of Headaches: Results from Randomized Multicenter DASH-Sodium Clinical Trial

|                                 |                                                                                                                                                                                                         |
|---------------------------------|---------------------------------------------------------------------------------------------------------------------------------------------------------------------------------------------------------|
| Journal:                        | <i>BMJ Open</i>                                                                                                                                                                                         |
| Manuscript ID:                  | bmjopen-2014-006671.R1                                                                                                                                                                                  |
| Article Type:                   | Research                                                                                                                                                                                                |
| Date Submitted by the Author:   | 19-Nov-2014                                                                                                                                                                                             |
| Complete List of Authors:       | Amer, Muhammad; Howard University Hospital, Medicine<br>Woodward, Mark; University of Oxford, Nuffield Department of Population Health<br>Appel, Lawrence; Johns Hopkins Medical Institutions, Medicine |
| <b>Primary Subject Heading</b>: | Epidemiology                                                                                                                                                                                            |
| Secondary Subject Heading:      | Evidence based practice, Public health                                                                                                                                                                  |
| Keywords:                       | Headache, Sodium, DASH-Sodium Trial                                                                                                                                                                     |
|                                 |                                                                                                                                                                                                         |

SCHOLARONE™  
Manuscripts

# Effects of Dietary Sodium and the DASH Diet on the Occurrence of Headaches: Results from Randomized Multicenter DASH-Sodium Clinical Trial

**Muhammad Amer, Mark Woodward, Lawrence J. Appel**

**Author's affiliation and address:**

***Muhammad Amer, MD, MHS, FACP***

Division of General Internal Medicine, Johns Hopkins University, 600 Wolfe St/ Osler 264  
Baltimore, MD 21287  
Howard University Hospital, Georgia Ave, NW, Washington, DC, 20060

***Mark Woodward, PhD***

Nuffield Department of Population Health, University of Oxford, UK  
Department of Epidemiology, Johns Hopkins Bloomberg School of Public Health, Baltimore, Maryland, USA.  
George Institute for Global Health, University of Sydney, Australia  
Welch Center for Prevention, 2024 E. Monument Street, Baltimore, Maryland, 21287, USA

***Lawrence J. Appel, MD, MPH***

Welch Center for Prevention, Epidemiology, and Clinical Research. Johns Hopkins Medical Institutions, Baltimore, Maryland. USA  
Department of Medicine, Johns Hopkins University School of Medicine, Baltimore, Maryland  
Department of Epidemiology, Johns Hopkins Bloomberg School of Public Health, Baltimore, Welch Center for Prevention, 2024 E. Monument Street, Room 2-600, Baltimore, Maryland, 21287 USA

**Declaration of competing interests:** None reported by any author.

**Trial Registration:** ClinicalTrials.gov Identifier: NCT00000608

1  
2  
3 **Financial Disclosure:** Drs. Appel and Woodward were co-investigators in a trial sponsored by the  
4  
5 McCormick Science Institute (completed in spring 2013).  
6  
7

8  
9 **Corresponding author:**

10  
11 **Lawrence J. Appel, MD, MPH**

12  
13 Professor of Medicine, Epidemiology and International Health

14  
15 2024 East Monument Street

16  
17 Baltimore, MD 21287

18  
19 Office (410)-955-4156

20  
21 Fax (410) 955-0476

22  
23 lappel@jhmi.edu  
24  
25  
26  
27  
28  
29  
30  
31  
32  
33  
34  
35  
36  
37  
38  
39  
40  
41  
42  
43  
44  
45  
46  
47  
48  
49  
50  
51  
52  
53  
54  
55  
56  
57  
58  
59  
60



## Abstract

**Objectives:** Headaches are a common medical problem, yet few studies, particularly trials, have evaluated therapies that might prevent or control headaches. We, thus, investigated the effects on the occurrence of headaches of three levels of dietary sodium intake and two diet patterns [the Dietary Approaches to Stop Hypertension (DASH) diet (rich in fruits, vegetables, and low-fat dairy products with reduced saturated and total fat) and a control diet (typical of Western consumption patterns)].

**Design:** Randomized multicenter clinical trial.

**Setting:** Post-hoc analyses of the DASH-Sodium trial in the USA.

**Participants:** In a multicenter feeding study with three 30 day periods, 390 participants were randomized to the DASH or control diet. On their assigned diet, participants ate food with high sodium during one period, intermediate sodium during another period, and low sodium during another period, in random order.

**Outcome measures:** Occurrence and severity of headache were ascertained from self-administered questionnaires, completed at the end of each feeding period.

**Results:** The occurrence of headaches was similar in DASH vs. Control, at high [odds ratio (95% confidence interval) = 0.65 (0.37-1.12); p=0.12], intermediate [0.57 (0.29-1.12); p =0.10], and low [0.64 (0.36-1.13); p=0.12] sodium levels. By contrast, there was a lower risk of headache on the low, compared to high, sodium level, both on the control [0.69 (0.49 - 0.99); p = 0.05] and DASH [0.69 (0.49-0.98); p=0.04] diets.

1 **Conclusions:** A reduced sodium intake was associated with a significantly lower risk of headache,  
2  
3  
4 whilst dietary patterns had no effect on the risk of headaches in adults. Reduced dietary sodium intake  
5  
6 offers a novel approach to prevent headaches.  
7  
8  
9  
10

11 **Key words:** Headache; Sodium; Dietary Approaches to Stop Hypertension; DASH-Sodium trial  
12  
13  
14  
15  
16  
17  
18  
19  
20  
21  
22  
23  
24  
25  
26  
27  
28  
29  
30  
31  
32  
33  
34  
35  
36  
37  
38  
39  
40  
41  
42  
43  
44  
45  
46  
47  
48  
49  
50  
51  
52  
53  
54  
55  
56  
57  
58  
59  
60

For peer review only

## Strengths and limitations of this study

- Post-hoc analysis of a multicenter randomized clinical trial comparing effects of the two diet patterns using parallel design together with a three-period crossover of three levels of dietary sodium [high (150 mmol), intermediate (100 mmol), low (50 mmol)] on headaches in healthy adults with stage 1 hypertension.
- Three screening and two run-in feeding periods prior to randomization to assess participant's eligibility, compliance with dietary requirements and to estimate caloric requirements to maintain weight during study.
- Vigorous efforts made to promote adherence with assigned diets during feeding periods.
- Lack of information on the prevalence of headaches at baseline as well as type of self-reported headaches experienced by participants at the end of feeding periods.

## Introduction

Worldwide, headache is a common medical problem and amongst the most frequently reported disorders of the nervous system [1-3]. Globally, 46% of adults are estimated to have an active headache disorder (42% for tension-type headaches; 11% for migraines) [2, 4-6]. Headaches affect all age groups, with a higher prevalence in women compared to men [4-6]. The direct cost of health care services, and medications for the management of headaches is likewise substantial [7-11], as are indirect costs. Patients with frequent headaches have a poor quality of life and a higher number of days absent from work, compared with others [12-15]. Hence, successful strategies to prevent and treat headache would confer substantial benefits to afflicted individuals, as well as to society in general.

Available data support a direct association between blood pressure and the occurrence of headache [16-19]. Therefore, it is reasonable to speculate that dietary factors that lower blood pressure (e.g. reduced sodium intake and the DASH diet [20, 21]) might also reduce the occurrence of headache. However, evidence on the relationship of headaches with sodium intake and other dietary factors is sparse, with most attention focusing on the potential role of monosodium glutamate intake [22-24]. In the primary results paper of the DASH-Sodium trial, which focused on the blood pressure effects of the dietary interventions, the authors briefly comment on the occurrence of headaches in the broad context of side effects. They reported that the side effect of headache occurred in 47% of participants during the high, compared to 39 percent during the low, sodium feeding period [21]. In this paper, we expand on these preliminary observations.

## Methods

A detailed description of the rationale, design, and methods of the DASH-Sodium trial has been published [25]. Briefly, DASH-Sodium was a multicenter, randomized clinical trial, conducted between September 1997 and November 1999, designed to compare the effects on blood pressure of three levels of dietary sodium and two diet patterns. The study design incorporated a parallel, two-group, comparison of diet (DASH diet vs. control diet) together with a three-period crossover of the three levels of dietary sodium intake, with a primary outcome of mean systolic blood pressure (Figure 1). The three sodium levels were 1) "high" (150 mmol, at 2100 Kcal caloric intake), reflecting average consumption in the USA, 2) "intermediate" (100 mmol) reflecting the upper limit of current recommendations for adults [26], and 3) "low" (50 mmol). The DASH diet is rich in fruits, vegetables, and low-fat dairy products, high in dietary fiber, potassium, calcium and magnesium, moderately high in protein, and low in saturated fat, cholesterol, and total fat. The control diet is typical of what many in the Western world eat.

Study participants were 412 adults (age  $\geq 22$  years) with systolic blood pressure between 120 and 159 mm Hg and diastolic blood pressure between 80 and 95 mm Hg (i.e., pre-hypertension or stage 1 hypertension). Major exclusion criteria were diabetes mellitus, evidence of active malignancy, history of cardiovascular event (angina, myocardial infarction, angioplasty, or stroke), renal insufficiency (serum creatinine  $> 1.2$  mg/dL for females or 1.5 mg/dL for males), anemia (hematocrit at least 5 percent below normal range), pregnancy, inflammatory bowel disease, body mass index  $> 40$  kg/m<sup>2</sup>, use

1  
2  
3  
4  
5  
6  
7  
8  
9  
10  
11  
12  
13  
14  
15  
16  
17  
18  
19  
20  
21  
22  
23  
24  
25  
26  
27  
28  
29  
30  
31  
32  
33  
34  
35  
36  
37  
38  
39  
40  
41  
42  
43  
44  
45  
46  
47  
48  
49  
50  
51  
52  
53  
54  
55  
56  
57  
58  
59  
60

of antihypertensive drugs and corticosteroids, and consumption of more than 14 alcoholic beverages per week.

Three screening visits (each separated by at least seven days) were conducted to assess general eligibility and to collect baseline data. Following the screening visits, eligible participants started a two-week run-in feeding period during which they ate the control diet at the high sodium level. The run-in feeding period was designed to exclude participants who were unlikely to comply with the dietary requirements and to estimate caloric requirements needed to maintain weight. Participants were then randomly assigned (generated using desktop PC at each coordinating center) to one of the two diets using a parallel-group design, and ate each of three sodium levels (feeding periods) for 30 days each, in a randomized crossover design. Participants were not notified of their assigned dietary pattern or sodium sequence.

During feeding periods (run-in and intervention), participants were required to eat at least one meal per day on site at the clinical center, five days per week, and to take food home for other meals. Participants were expected to eat all of their food and were instructed to record the type and amount of any uneaten study food. Caffeinated beverages and alcohol were limited and monitored. Individual energy intake (calorie content) was adjusted so that each participant's weight during each feeding period remained stable.

Data collection staff were masked to randomized sodium and diet sequence. Measurements were obtained during screening and at the end of each feeding period. Blood pressure was measured in a

1 seated position, using the right arm of participants. Twenty-four hour urine (for analysis of sodium,  
2 potassium, urea nitrogen, and creatinine) and body weight were also collected. Compliance with the  
3 feeding protocol was assessed by urinary excretion of sodium, potassium, phosphorus, urea nitrogen,  
4 and creatinine, estimated from 24 hour urine collections.  
5  
6  
7  
8  
9

10  
11  
12  
13  
14 Symptoms (side effects) including headache, bloating, dry mouth, excessive thirst, fatigue or low  
15 energy, lightheadedness, nausea, and change in taste, were collected via self-administered questionnaires  
16 (see Supplement) completed during the last seven days of each sodium feeding period. For each  
17 symptom, potential responses were (1) "none" for not experiencing any symptom, (2) "mild" if symptom  
18 occurred but did not interfere with usual activities, (3) "moderate" if symptom occurred and somewhat  
19 interfered with usual activities, and (4) "severe" if participants were unable to perform usual activities  
20 due to the symptom.  
21  
22  
23  
24  
25  
26  
27  
28  
29  
30  
31  
32  
33  
34  
35

36 This analysis of the DASH-Sodium trial included 390 (95%) of the 412 randomized participants.

37 Excluded participants were those with missing information on headaches in any of the 3 feeding periods.  
38 For the primary analysis in this study, headache was defined as "any headache" (mild, moderate or  
39 severe) during the last seven days of each feeding period. Subsequently, we report frequency of  
40 headache by severity.  
41  
42  
43  
44  
45  
46  
47  
48  
49  
50  
51

52 The means and proportions between groups were explored using t-tests and chi-square tests,  
53 respectively. A non-parametric test ([extension of Wilcoxon rank-sum test](#)) was used for trends in the  
54 frequency of headache by sodium intake. Since multiple observations were obtained on each participant,  
55  
56  
57  
58  
59

1 we used generalized estimating equation models [27], with a logit link and binomial error and an  
2  
3 exchangeable covariance structure, to model the odds of a headache. The adjusted covariates used in this  
4  
5 analysis were measured at baseline. Models were adjusted for age, sex, race, clinical site, systolic blood  
6  
7 pressure, body mass index, and smoking status. The potential for carryover effects was unavoidable in  
8  
9 this trial, however, since the experimental agent was one's diet and participants must eat something  
10  
11 during these intervals, statistical (GEE) models were also adjusted for carry-over effects from the  
12  
13 previous periods. To address the qualitative consistency and benefit-hazard profiles between  
14  
15 participants, subgroup analysis by diet stratified by age, sex, race, obesity ( $\text{BMI} \geq 30 \text{ kg/m}^2$  v not) and  
16  
17 hypertension (blood pressure  $\geq 140/90$  mmHg v not) status at baseline were also performed. Interactions  
18  
19 between subgroups were tested by the addition of an interaction term to the main effects model.  
20  
21  
22  
23  
24  
25  
26  
27  
28

29 Institutional review boards at the participating centers and an external data and safety monitoring  
30  
31 committee approved the trial protocol and consent procedures. Each participant provided written,  
32  
33 informed consent.  
34  
35  
36  
37  
38  
39  
40

41 A p-value of  $\leq 0.05$  was considered statistically significant. All analyses were performed using Stata  
42  
43 version 12.1 (Stata Corp LP, College Station, Texas, USA).  
44  
45  
46  
47  
48  
49  
50

## 51 Results

52  
53  
54  
55  
56  
57  
58  
59  
60



1 The 390 participants included in our analyses were those with completed symptoms questionnaires - 192  
2  
3  
4 (94%) of the 204 participants assigned to the control diet and 198 (95%) of the 208 participants assigned  
5  
6 to the DASH diet. Clinical and demographic characteristics of the two groups were similar (Table 1).  
7  
8  
9

10  
11  
12  
13 Figure 2 displays the distribution of headaches by sodium level and assigned diet. The highest  
14  
15 occurrence of headache was reported by participants on the control diet with high sodium (47%) and the  
16  
17 lowest by participants on the DASH diet with low sodium level (36%). On both diets, the number of  
18  
19 headaches reported was greatest for the high sodium level and least on the low sodium level.  
20  
21  
22  
23  
24  
25  
26

27  
28 Among those assigned to the control diet, mean (SD) urinary sodium excretion was 141 (55), 106 (43)  
29  
30 and 64 (37) mmol per 24 hours during the high, intermediate, and low sodium feeding periods,  
31  
32 respectively. In the DASH diet group, mean (SD) urinary sodium levels were 144 (57), 107 (52) and 67  
33  
34 (46) mmol per 24 hour during the high, intermediate, and low sodium feeding periods, respectively. On  
35  
36 each sodium level, mean urinary sodium excretion was similar in those assigned to the two diets (each  $p$   
37  
38  $> 0.05$ ). Mean urinary potassium and urea nitrogen were higher in the DASH diet group, reflecting the  
39  
40 higher vegetable, dairy, and protein content of the DASH diet compared with the control diet, at each  
41  
42 sodium level (Table 2).  
43  
44  
45  
46  
47  
48  
49  
50

51 Table 3 shows differences in the odds of headache by diet and sodium level. Compared to the high  
52  
53 sodium level, we observed a lower odds of any headache during the low sodium period both on the  
54  
55 control diet (adjusted OR: 0.69, 95% CI: 0.49-0.99) and the DASH diet (adjusted OR: 0.69, 95% CI:  
56  
57  
58  
59  
60

1 0.49-0.98). Although the relationship appeared graded (Figure 2), there was no significant difference  
2  
3 between the intermediate level of sodium and either the low or high sodium levels, on either diet. There  
4  
5 was no significant association of diet pattern (DASH vs. Control) with headache on any sodium level.  
6  
7 There was also no significant interaction between diet and sodium on the occurrence of headaches (p-  
8  
9 interaction > 0.05). Compared to the control diet with high sodium, there was a reduced risk of a  
10  
11 headache on the DASH diet with low sodium (adjusted OR = 0.64, 95% CI: 0.41 – 0.99, p = 0.05).  
12  
13  
14  
15  
16  
17  
18  
19

20 While on control diet, the number of persons who reported a severe headache was 4 (2.1%) during high,  
21  
22 1 (0.5%) during intermediate, and 1 (0.5%) during low sodium periods, respectively (p for trend = 0.13).  
23  
24 On DASH diet, the corresponding number of persons who reported a severe headache was 8 (4%)  
25  
26 during high, 2 (1%) during intermediate, and 3 (1.5%) during low sodium periods, respectively (p for  
27  
28 trend= 0.08). The frequency of severe headache was similar (p = 0.3) by diet [DASH 8 (4%) and control  
29  
30 4 (2%)] during high sodium feeding period. (Table 4)  
31  
32  
33  
34  
35  
36  
37  
38

39 There was no evidence that the relationship between sodium levels and headache was modified by age,  
40  
41 sex, race, baseline BMI or blood pressure (Figure 3).  
42  
43  
44  
45  
46  
47

## 48 Discussion

49  
50  
51  
52  
53  
54

55 In this secondary analysis of the DASH-Sodium trial, which enrolled adults with pre- and stage 1  
56  
57 hypertension, a reduced dietary sodium intake was associated with a lower risk of headache, both on the  
58  
59

1 control diet and the DASH diet. In contrast, the risk of headache was similar on the DASH and control  
2  
3  
4 diets.

5  
6  
7  
8  
9  
10 The epidemiological literature on headaches in adults is limited [1, 2, 6]. However, it is well-recognized  
11 that, compared to normotensive individuals, individuals with hypertension have a higher frequency of  
12 headaches [16-19, 28]. Of note, Cooper *et al* reported a direct relationship of headaches with both  
13  
14 systolic and diastolic blood pressure [17]. As regards trials, in a pooled analysis that included seven  
15  
16 double-blinded, randomized placebo controlled trials of Ibesartan therapy, Hansson *et al* found a direct  
17  
18 relationship of diastolic blood pressure with incident headaches in 2673 patients with mild to moderate  
19  
20 hypertension [29].  
21  
22  
23  
24  
25  
26  
27  
28  
29  
30

31 The association between dietary sodium intake and blood pressure is also well recognized [30, 31]. The  
32  
33 DASH diet alone and in combination with reduced sodium intake lowers blood pressure in patients with  
34  
35 or without hypertension [20, 21]. It is noteworthy that there was no significant relationship between diet  
36  
37 pattern and headache. This suggests that a process that is independent of a blood pressure may mediate  
38  
39 the relationship between sodium and headaches.  
40  
41  
42  
43  
44  
45  
46

47 Our results contrast with the popular belief that a diet rich in fruits, vegetables and potassium and low in  
48  
49 saturated and total fat may ease the frequency, or even prevent, headache [32]. Several dietary factors,  
50  
51 including fasting, alcoholic drinks, chocolate, coffee, and cheese, appear to trigger vascular headache  
52  
53 (cluster or migraine) in adults [33- 36]. In some studies, an increased intake of monosodium glutamate is  
54  
55 associated with the occurrence of headaches [22-24]. However, a recent review concluded that evidence  
56  
57  
58  
59  
60

1 on the relationship of sodium glutamate intake and headaches is inconsistent [37]. In one study of 200  
2 adults (mean age 37.7 years, 81% females), monosodium glutamate was identified as a trigger for  
3 migraine headache in only 5 (2.5%) of study participants [36]. However, data on the relationship  
4 between sodium intake and any form of headaches are sparse.  
5  
6  
7  
8  
9

10  
11  
12  
13  
14  
15 The results of this study provide encouraging evidence in support of dietary recommendations to lower  
16 sodium intake: recommendations which are currently based on the relationship of sodium intake with  
17 blood pressure. The daily intake of sodium in adults living in the United States is already in excess of  
18 their physiological need and for many individuals, is much higher than the highest level tested in this  
19 study [38, 39]. Our results also support the recent World Health Organization guidelines for reducing  
20 sodium intake to less than 87 mmol/day [40] and American Heart Association guidelines for reducing  
21 sodium intake to 65 mmol/day [31].  
22  
23  
24  
25  
26  
27  
28  
29  
30  
31  
32  
33  
34  
35

36 Strengths of our study include its randomized controlled design comparing two diets using a parallel  
37 design and a three-period crossover of three levels of dietary sodium (high, intermediate, and low).  
38 Dietary intake during the feeding periods was closely monitored and vigorous efforts were made to  
39 promote adherence with assigned diets. The participants of this study were healthy, non-  
40 institutionalized, racially diverse, middle- and older-aged men and women. Hence we believe that these  
41 results are applicable to a large fraction of adults.  
42  
43  
44  
45  
46  
47  
48  
49  
50  
51  
52  
53

54 Our study also has limitations. Information on the prevalence of headache at baseline from eligible  
55 participants was lacking. In addition, there was no information about the type of headache (tension,  
56  
57  
58  
59  
60

1 cluster or migraine) experienced by study participants. However, we suspect that most of the headaches  
2  
3 were tension headaches. Whether a reduced sodium intake can prevent vascular headache is unknown.  
4  
5 Second, the instrument was administered just once in each feeding period and does not allow calculation  
6  
7 of an event rate, such as person-days of headaches. Third, these are secondary, post-hoc analyses from a  
8  
9 trial that was not explicitly designed to test the effects of dietary factors on headaches. Nonetheless, a  
10  
11 rigorously controlled feeding study designed to test the effects of dietary factors on occurrence of  
12  
13 headaches would be extremely expensive and logistically challenging. Fourth, our results likely  
14  
15 underestimate the relationship of sodium intake with headaches. The range of sodium intake was  
16  
17 relatively narrow - the highest sodium group in our trial actually corresponds to the average in the USA  
18  
19 and is much lower than the intake in many countries, particularly in Asia. Self-report of symptoms is  
20  
21 inherently imprecise and could bias results to the null, given that a validated instrument was not used for  
22  
23 patient-reported headache.  
24  
25  
26  
27  
28  
29  
30  
31  
32  
33  
34  
35  
36

37 In conclusion, a reduced sodium intake was associated with significantly lower risk of headache, while  
38  
39 diet patterns had no effect on the risk of headaches. A reduced dietary sodium intake offers a novel  
40  
41 approach to prevent headache in adults. Additional studies are needed to replicate these findings and to  
42  
43 explore mechanisms that mediate the association between sodium intake and headache.  
44  
45  
46  
47  
48  
49  
50  
51  
52  
53  
54  
55  
56  
57  
58  
59  
60

1  
2  
3  
4  
5  
6  
7  
8 **Contribution statement:** All three authors (Muhammad Amer, Mark Woodward, and Lawrence  
9  
10 Appel) have substantially contributed to the conception, drafting, editing and revising for the important  
11  
12 intellectual content of the manuscript. Muhammad Amer and Mark Woodward were responsible for  
13  
14 analyses of the data. All three authors participated in the interpretation of the analysis and agreed for the  
15  
16 final approval of the version to be published. Authors are in agreement to be accountable for all aspects  
17  
18 of the work related to this manuscript and responsible for the integrity of any part of the work shown in  
19  
20 this post-hoc analysis of the DASH-Sodium clinical trial.  
21  
22  
23

24  
25 **Competing interests:** None reported by any author  
26  
27

28 **Funding:** This study received no specific grant from any funding agency.  
29  
30

31 **Data sharing:** No additional data available to share.  
32  
33  
34  
35  
36  
37  
38  
39  
40  
41  
42  
43  
44  
45  
46  
47  
48  
49  
50  
51  
52  
53  
54  
55  
56  
57  
58  
59  
60

## References

- 1- Benbir G, Karadeniz D, Göksan B. The characteristics and subtypes of headache in relation to age and gender in a rural community in Eastern Turkey. *Agri*. 2012 Oct; 24(4):145-52
- 2- Stovner Lj, Hagen K, Jensen R et al. The global burden of headache: a documentation of headache prevalence and disability worldwide. *Cephalalgia*. 2007 Mar; 27(3):193-210.
- 3- Andlin-Sobocki P, Jönsson B, Wittchen HU, Olesen J. Cost of disorders of the brain in Europe. *Eur J Neurol*. 2005 Jun; 12 Suppl 1:1-27
- 4- Jensen R, Stovner LJ. Epidemiology and comorbidity of headache. *Lancet Neurol*. 2008 Apr; 7(4):354-61.
- 5- Zwart JA, Dyb G, Holmen TL, Stovner LJ, Sand T. The prevalence of migraine and tension-type headaches among adolescents in Norway: The Nord- Trøndelag Health Study (Head-Hunt). *Cephalalgia*. 2004 May; 24(5):373-9
- 6- Rasmussen BK. Epidemiology of headache. *Cephalalgia*. 2001 Sep; 21(7):774-7.
- 7- Berg J, Stovner LJ. Cost of migraine and other headaches in Europe. *Eur J Neurol* 2005; 12 (suppl 1): 59–62.
- 8- Rasmussen BK, Jensen R, Olesen J. Impact of headache on sickness absence and utilisation of medical services: a Danish population study. *J Epidemiol Community Health* 1992; 46: 443–46
- 9- Lyngberg AC, Rasmussen BK, Jensen R, et al. Secular changes in health care utilization and work absence for migraine and tension type headache. A population based study. *J Epidemiol Com Health* 2005; 20: 1007–14.
- 10- Von Korff M, Stewart W, Lipton RB. Assessing headache severity: new directions. *Neurology* 1998; 44 (Suppl 4):40–6.

- 1  
2  
3  
4  
5  
6  
7  
8  
9  
10  
11  
12  
13  
14  
15  
16  
17  
18  
19  
20  
21  
22  
23  
24  
25  
26  
27  
28  
29  
30  
31  
32  
33  
34  
35  
36  
37  
38  
39  
40  
41  
42  
43  
44  
45  
46  
47  
48  
49  
50  
51  
52  
53  
54  
55  
56  
57  
58  
59  
60
- 11- Michel P, Dartiques J, Duru G, Moreau J, Salamon R, Henry P. Incremental absenteeism due to headache in migraine: results from the Mig-Access French National Cohort. *Cephalalgia*. 1999 Jun; 19(5):503-10.
- 12- Vinding GR, Zeeberg P, Lyngberg A, Nielsen RT, Jensen R. The burden of headache in a patient population from a specialized headache centre. *Cephalalgia*. 2007 Mar; 27(3):263-70.
- 13- Medizabel JE, Rothrock JF. An interregional comparative study of headache clinic populations. *Cephalalgia*. 1998 Jan; 18(1):57-9.
- 14- Saper JR, Lake AE, Madden SF, Kreeger C. Comprehensive/tertiary care for headache: a 6-month outcome study. *Headache*. 1999 Apr; 39(4):249-63.
- 15- Bussone G, Usai S, Grazzi L, Rigamonti A, Solari A, D'Amico D. Disability and quality of life in different primary headaches: results from Italian studies. *Neurol Sci*. 2004 Oct; 25 Suppl 3:S105-7.
- 16- Kruszewski P, Bieniaszewski L, Neubauer J, Krupa-Wojciechowska B. Headache in patients with mild to moderate hypertension is generally not associated with simultaneous blood pressure elevation. *J Hypertens*. 2000 Apr; 18(4):437-44.
- 17- Cooper WD, Glover DR, Hormbrey JM, Kimber GR. Headache and blood pressure: evidence of a close relationship. *J Hum Hypertens*. 1989 Feb; 3(1):41-4.
- 18- Janeway TC. A clinical study of hypertensive cardiovascular disease. *Arch Intern Med*. 1913; 12: 755-798
- 19- Barlow DH, Beevers DG, Hawthorne VM, Watt HD, Young GA. Blood pressure measurement at screening and in general practice. *Br Heart J*. 1977 Jan; 39(1):7-12.
- 20- Appel LJ, Moore TJ, Obarzanek E et al. A clinical trial of the effects of dietary patterns on blood pressure. DASH Collaborative Research Group. *N Engl J Med*. 1997 Apr 17; 336(16):1117-24.
- 21- Sacks FM, Svetkey LP, Vollmer WM et al; DASH-Sodium Collaborative Research Group. Effects on blood pressure of reduced dietary sodium and the Dietary Approaches to Stop



- 1 Hypertension (DASH) diet. DASH-Sodium Collaborative Research Group. *N Engl J Med*. 2001  
2  
3  
4 Jan 4;344(1):3-10  
5
- 6 22- Yang WH, Drouin MA, Herbert M, Mao Y, Karsh J. The monosodium glutamate symptom  
7  
8 complex: assessment in a double-blind, placebo-controlled, randomized study. *J Allergy Clin*  
9  
10 *Immunol*. 1997 Jun; 99(6 Pt 1):757-62.  
11
- 12 23- Randolph TG, Rollins JP. Beet sensitivity: allergic reactions from the ingestion of beet sugar  
13  
14 (sucrose) and monosodium glutamate of beet origin. *J Lab Clin Med* 1950; 36:407-17.  
15
- 16 24- Ratner D, Eshel E, Shoshani E. Adverse effects of monosodium glutamate: a diagnostic problem.  
17  
18 *Israel J Med Sci* 1984;20:252-3  
19
- 20 25- Svetkey LP, Sacks FM, Obarzanek E et al. The DASH Diet, Sodium Intake and Blood Pressure  
21  
22 Trial (DASH-sodium): rationale and design. DASH-Sodium Collaborative Research Group. *J*  
23  
24 *Am Diet Assoc*. 1999 Aug; 99(8 Suppl):S96-104.  
25  
26  
27  
28
- 29 26- The sixth report of the Joint National Committee on Prevention, Detection, Evaluation, and  
30  
31 Treatment of High Blood Pressure. *Arch Intern Med* 1997; 157: 2413-46. [Erratum, *Arch Intern*  
32  
33 *Med* 1998; 158:573.  
34  
35
- 36 27- Liang K-Y, Zeger SL. Longitudinal data analysis using generalized linear models. *Biometrika*  
37  
38 1986;73:13-22  
39
- 40 28- Sigurdsson JA, Bengtsson C. Symptoms and signs in relation to blood pressure and  
41  
42 antihypertensive treatment. A cross-sectional and longitudinal population study of middle-aged  
43  
44 Swedish women. *Acta Med Scand*. 1983; 213(3):183-90.  
45  
46  
47
- 48 29- Hansson L, Smith DH, Reeves R, Lapuerta P. Headache in mild-to-moderate hypertension and  
49  
50 its reduction by irbesartan therapy. *Arch Intern Med*. 2000 Jun 12; 160 (11):1654-8.  
51  
52
- 53 30- Aburto NJ, Ziolkovska A, Hooper L, Elliott P, Cappuccio FP, Meerpohl JJ. Effect of lower  
54  
55 sodium intake on health: systematic review and meta-analyses. *BMJ*. 2013 Apr 3; 346:f1326.  
56  
57  
58  
59  
60

- 1  
2  
3  
4  
5  
6  
7  
8  
9  
10  
11  
12  
13  
14  
15  
16  
17  
18  
19  
20  
21  
22  
23  
24  
25  
26  
27  
28  
29  
30  
31  
32  
33  
34  
35  
36  
37  
38  
39  
40  
41  
42  
43  
44  
45  
46  
47  
48  
49  
50  
51  
52  
53  
54  
55  
56  
57  
58  
59  
60
- 31- Appel LJ, Brands MW, Daniels SR, Karanja N, Elmer PJ, Sacks FM; American Heart Association. Dietary approaches to prevent and treat hypertension: a scientific statement from the American Heart Association. *Hypertension*. 2006 Feb; 47(2):296-308.
- 32- Buchholz, David. *Heal Your Headache: The 1-2-3 Program for Taking Charge of Your Headaches*. New York: Workman, 2002.
- 33- Savi L, Rainero I, Valfrè W, Gentile S, Lo Giudice R, Pinessi L. Food and headache attacks. A comparison of patients with migraine and tension-type headache. *Panminerva Med*. 2002 Mar; 44(1):27-31.
- 34- Peatfield RC. Relationships between food, wine, and beer-precipitated migrainous headaches. *Headache*. 1995 Jun; 35(6):355-7.
- 35- Carod-Artal FJ, Ezpeleta D, Martín-Barriga ML, Guerrero AL. Triggers, symptoms, and treatment in two populations of migraineurs in Brazil and Spain. A cross-cultural study. *J Neurol Sci*. 2011 May 15; 304(1-2):25-8.
- 36- Fukui PT, Gonçalves TR, Strabelli CG et al. Trigger factors in migraine patients. *Arq Neuropsiquiatr*. 2008 Sep; 66(3A):494-9.
- 37- Freeman M. Reconsidering the effects of monosodium glutamate: a literature review. *J Am Acad Nurse Pract*. 2006 Oct; 18(10):482-6.
- 38- Brown IJ, Tzoulaki I, Candeias V, Elliott P. Salt intakes around the world: implications for public health. *Int J Epidemiol*. 2009 Jun; 38(3):791-813.
- 39- National Center for Chronic Disease Prevention and Health Promotion Division for Heart Disease and Stroke Prevention Fact sheet; [http://www.cdc.gov/salt/pdfs/Sodium\\_Fact\\_Sheet.pdf](http://www.cdc.gov/salt/pdfs/Sodium_Fact_Sheet.pdf). Accessed September 28, 2013.
- 40- WHO. *Guideline: Sodium intake for adults and children*. Geneva, World Health Organization (WHO), 2012.

**Table 1: Baseline characteristics of participants in DASH-Sodium trial**  
 [Number (percentage) or mean (standard deviation)]

| Characteristic                        | Control<br>Diet<br>(n=192) | DASH<br>Diet<br>(n=198) | Total<br>(n=390) |
|---------------------------------------|----------------------------|-------------------------|------------------|
| Age (years)                           | 49 (10)                    | 47 (10)                 | 48 (10)          |
| Females, n (%)                        | 104 (54)                   | 118 (60)                | 222 (57)         |
| Race, n (%)                           |                            |                         |                  |
| Caucasian                             | 78 (41)                    | 81 (41)                 | 159 (41)         |
| African American                      | 109 (57)                   | 114 (57)                | 223 (57)         |
| Other                                 | 5 (3)                      | 3 (2)                   | 8 (2)            |
| Body Mass Index, (kg/m <sup>2</sup> ) | 30 (5)                     | 29 (5)                  | 29.2 (5)         |
| Systolic Blood Pressure (mm Hg)       | 135 (9)                    | 134 (9)                 | 135 (9)          |
| Diastolic Blood Pressure (mm Hg)      | 86 (4)                     | 85 (5)                  | 86 (4)           |
| Hypertension, n (%) †                 | 76 (40)                    | 79 (40)                 | 155 (40)         |
| Current Smoker, n (%)                 | 21 (11)                    | 21 (11)                 | 42 (11)          |

†Hypertension was defined as an average systolic blood pressure of 140 mm of Hg or an average diastolic blood pressure of 90 mmHg during the three screening visits.

**Table 2: Urinary excretion according to sodium level and diet**  
**[Mean (standard deviation)]**

|                      | Level of sodium |                    |                 |                    |                 |                    |
|----------------------|-----------------|--------------------|-----------------|--------------------|-----------------|--------------------|
|                      | High            |                    | Intermediate    |                    | Low             |                    |
|                      | DASH<br>(n=198) | Control<br>(n=192) | DASH<br>(n=198) | Control<br>(n=192) | DASH<br>(n=198) | Control<br>(n=192) |
| <b>Sodium</b>        |                 |                    |                 |                    |                 |                    |
| gram/day             | 3.3 (1.3)       | 3.2 (1.3)          | 2.5 (1.2)       | 2.4 (0.9)          | 1.5 (1.1)       | 1.5 (0.8)          |
| mmol/day             | 144 (57)        | 141 (55)           | 107 (52)        | 106 (43)           | 67 (46)         | 64 (37)            |
| <b>Potassium</b>     |                 |                    |                 |                    |                 |                    |
| gram/day             | 3.0 (1.1)       | 1.6 (0.5)          | 3.2 (1.2)       | 1.6 (0.5)          | 3.2 (1.1)       | 1.6 (0.5)          |
| mmol/day             | 76 (27)         | 40 (14)            | 82 (31)         | 41 (14)            | 81 (29)         | 41 (14)            |
| <b>Urea Nitrogen</b> |                 |                    |                 |                    |                 |                    |
| gram/day             | 11.5 (4)        | 9.5 (3.2)          | 12.4 (4.5)      | 9.7 (3.4)          | 12 (4)          | 10 (3.3)           |
| <b>Creatinine</b>    |                 |                    |                 |                    |                 |                    |
| gram/day             | 1.4 (0.5)       | 1.5 (0.5)          | 1.5 (0.6)       | 1.5 (0.6)          | 1.4 (0.5)       | 1.5 (0.6)          |

Table 3: Odds ratio of headaches by diet and sodium sequence

|                                                                   | Odds ratio (95 % CI) | <i>p</i> value |
|-------------------------------------------------------------------|----------------------|----------------|
| <b><i>Sodium effects on the DASH diet</i></b>                     |                      |                |
| Intermediate v high sodium                                        | 0.72 (0.51-1.01)     | 0.06           |
| Low v intermediate sodium                                         | 0.96 (0.68-1.37)     | 0.85           |
| Low v high sodium                                                 | 0.69 (0.49-0.98)     | 0.04           |
| <b><i>Sodium effects on the control diet</i></b>                  |                      |                |
| Intermediate v high sodium                                        | 0.81 (0.57-1.15)     | 0.24           |
| Low v intermediate sodium                                         | 0.86 (0.59-1.24)     | 0.42           |
| Low v high sodium                                                 | 0.69 (0.49-0.99)     | 0.05           |
| <b><i>Diet effects (DASH vs Control) at each sodium level</i></b> |                      |                |
| On high sodium                                                    | 0.65 (0.37-1.12)     | 0.12           |
| On intermediate sodium                                            | 0.57 (0.29-1.12)     | 0.10           |
| On low sodium                                                     | 0.64 (0.36-1.13)     | 0.12           |
| <b><i>Low Sodium on DASH vs High Sodium on Control</i></b>        | 0.64 (0.14-0.99)     | 0.05           |

Models adjusted for age, sex, race, site, systolic blood pressure, BMI, smoking status and carry over effects from the previous period. CI =confidence interval.

**Table 4: Occurrence and severity of headache by sodium level and diet, n (%)**

|                 | Level of sodium |                    |                 |                    |                 |                    |
|-----------------|-----------------|--------------------|-----------------|--------------------|-----------------|--------------------|
|                 | High            |                    | Intermediate    |                    | Low             |                    |
|                 | DASH<br>(n=198) | Control<br>(n=192) | DASH<br>(n=198) | Control<br>(n=192) | DASH<br>(n=198) | Control<br>(n=192) |
| <b>Mild</b>     | 60 (30)         | 70 (36)            | 43 (22)         | 62 (32)            | 53 (27)         | 53 (28)            |
| <b>Moderate</b> | 17 (9)          | 17 (9)             | 31 (16)         | 16 (8)             | 16 (8)          | 21 (11)            |
| <b>Severe</b>   | 8 (4)           | 4 (2)              | 2 (1)           | 1 (0.5)            | 3 (1)           | 1 (0.5)            |

1  
2  
3  
4  
5  
6  
7  
8  
9  
10  
11  
12  
13  
14  
15  
16  
17  
18  
19  
20  
21  
22  
23  
24  
25  
26  
27  
28  
29  
30  
31  
32  
33  
34  
35  
36  
37  
38  
39  
40  
41  
42  
43  
44  
45  
46  
47  
48  
49  
50  
51  
52  
53  
54  
55  
56  
57  
58  
59  
60

**FIGURE LEGEND:**

**Figure 1:** DASH-Sodium Trial Flow Diagram

**Figure 2:** Frequency of headache by diet and sodium level.

**Figure 3**

**(a):** Odds of headache (low vs high sodium) by subgroup, in the DASH diet

**(b):** Odds of headache (low vs high sodium) by subgroup, in the Control diet

1  
2  
3  
4  
5  
6  
7  
8  
9  
10  
11  
12  
13  
14  
15  
16  
17  
18  
19  
20  
21  
22  
23  
24  
25  
26  
27  
28  
29  
30  
31  
32  
33  
34  
35  
36  
37  
38  
39  
40  
41  
42  
43  
44  
45  
46  
47  
48  
49  
50  
51  
52  
53  
54  
55  
56  
57  
58  
59  
60

# Effects of Dietary Sodium and the DASH Diet on the Occurrence of Headaches: Results from Randomized Multicenter DASH-Sodium Clinical Trial

**Muhammad Amer, Mark Woodward, Lawrence J. Appel**

**Author's affiliation and address:**

***Muhammad Amer, MD, MHS, FACP***

Division of General Internal Medicine, Johns Hopkins University, 600 Wolfe St/ Osler 264  
Baltimore, MD 21287  
Howard University Hospital, Georgia Ave, NW, Washington, DC, 20060

***Mark Woodward, PhD***

Nuffield Department of Population Health, University of Oxford, UK  
Department of Epidemiology, Johns Hopkins Bloomberg School of Public Health, Baltimore, Maryland,  
USA.  
George Institute for Global Health, University of Sydney, Australia  
Welch Center for Prevention, 2024 E. Monument Street, Baltimore, Maryland, 21287, USA

***Lawrence J. Appel, MD, MPH***

Welch Center for Prevention, Epidemiology, and Clinical Research. Johns Hopkins Medical Institutions,  
Baltimore, Maryland. USA  
Department of Medicine, Johns Hopkins University School of Medicine, Baltimore, Maryland  
Department of Epidemiology, Johns Hopkins Bloomberg School of Public Health, Baltimore,  
Welch Center for Prevention, 2024 E. Monument Street, Room 2-600, Baltimore, Maryland, 21287  
USA

**Declaration of competing interests:** None reported by any author.

**Trial Registration:** ClinicalTrials.gov Identifier: NCT00000608



1  
2  
3 **Financial Disclosure:** Drs. Appel and Woodward were co-investigators in a trial sponsored by the  
4  
5 McCormick Science Institute (completed in spring 2013).  
6  
7

8  
9 **Corresponding author:**

10  
11 **Lawrence J. Appel, MD, MPH**

12  
13 Professor of Medicine, Epidemiology and International Health

14  
15 2024 East Monument Street

16  
17 Baltimore, MD 21287

18  
19 Office (410)-955-4156

20  
21 Fax (410) 955-0476

22  
23 lappel@jhmi.edu  
24  
25  
26  
27  
28  
29  
30  
31  
32  
33  
34  
35  
36  
37  
38  
39  
40  
41  
42  
43  
44  
45  
46  
47  
48  
49  
50  
51  
52  
53  
54  
55  
56  
57  
58  
59  
60

## Abstract

**Objectives:** Headaches are a common medical problem, yet few studies, particularly trials, have evaluated therapies that might prevent or control headaches. We, thus, investigated the effects on the occurrence of headaches of three levels of dietary sodium intake and two diet patterns [the Dietary Approaches to Stop Hypertension (DASH) diet (rich in fruits, vegetables, and low-fat dairy products with reduced saturated and total fat) and a control diet (typical of Western consumption patterns)].

**Design:** Randomized multicenter clinical trial.

**Setting:** Post-hoc analyses of the DASH-Sodium trial in the USA.

**Participants:** In a multicenter feeding study with three 30 day periods, 390 participants were randomized to the DASH or control diet. On their assigned diet, participants ate food with high sodium during one period, intermediate sodium during another period, and low sodium during another period, in random order.

**Outcome measures:** Occurrence and severity of headache were ascertained from self-administered questionnaires, completed at the end of each feeding period.

**Results:** The occurrence of headaches was similar in DASH vs. Control, at high [odds ratio (95% confidence interval) = 0.65 (0.37-1.12); p=0.12], intermediate [0.57 (0.29-1.12); p=0.10], and low [0.64 (0.36-1.13); p=0.12] sodium levels. By contrast, there was a lower risk of headache on the low, compared to high, sodium level, both on the control [0.69 (0.49 - 0.99); p = 0.05] and DASH [0.69 (0.49-0.98); p=0.04] diets.

1 **Conclusions:** A reduced sodium intake was associated with a significantly lower risk of headache,  
2  
3  
4 whilst dietary patterns had no effect on the risk of headaches in adults. Reduced dietary sodium intake  
5  
6 offers a novel approach to prevent headaches.  
7  
8  
9

10  
11 **Key words:** Headache; Sodium; Dietary Approaches to Stop Hypertension; DASH-Sodium trial  
12  
13  
14  
15  
16  
17  
18  
19  
20  
21  
22  
23  
24  
25  
26  
27  
28  
29  
30  
31  
32  
33  
34  
35  
36  
37  
38  
39  
40  
41  
42  
43  
44  
45  
46  
47  
48  
49  
50  
51  
52  
53  
54  
55  
56  
57  
58  
59  
60

For peer review only

## Strengths and limitations of this study

- Post-hoc analysis of a multicenter randomized clinical trial comparing effects of the two diet patterns using parallel design together with a three-period crossover of three levels of dietary sodium [high (150 mmol), intermediate (100 mmol), low (50 mmol)] on headaches in healthy adults with stage 1 hypertension.
- Three screening and two run-in feeding periods prior to randomization to assess participant's eligibility, compliance with dietary requirements and to estimate caloric requirements to maintain weight during study.
- Vigorous efforts made to promote adherence with assigned diets during feeding periods.
- Lack of information on the prevalence of headaches at baseline as well as type of self-reported headaches experienced by participants at the end of feeding periods.

## Introduction

Worldwide, headache is a common medical problem and amongst the most frequently reported disorders of the nervous system [1-3]. Globally, 46% of adults are estimated to have an active headache disorder (42% for tension-type headaches; 11% for migraines) [2, 4-6]. Headaches affect all age groups, with a higher prevalence in women compared to men [4-6]. The direct cost of health care services, and medications for the management of headaches is likewise substantial [7-11], as are indirect costs. Patients with frequent headaches have a poor quality of life and a higher number of days absent from work, compared with others [12-15]. Hence, successful strategies to prevent and treat headache would confer substantial benefits to afflicted individuals, as well as to society in general.

Available data support a direct association between blood pressure and the occurrence of headache [16-19]. Therefore, it is reasonable to speculate that dietary factors that lower blood pressure (e.g. reduced sodium intake and the DASH diet [20, 21]) might also reduce the occurrence of headache. However, evidence on the relationship of headaches with sodium intake and other dietary factors is sparse, with most attention focusing on the potential role of monosodium glutamate intake [22-24]. In the primary results paper of the DASH-Sodium trial, which focused on the blood pressure effects of the dietary interventions, the authors briefly comment on the occurrence of headaches in the broad context of side effects. They reported that the side effect of headache occurred in 47% of participants during the high, compared to 39 percent during the low, sodium feeding period [21]. In this paper, we expand on these preliminary observations.

## Methods

A detailed description of the rationale, design, and methods of the DASH-Sodium trial has been published [25]. Briefly, DASH-Sodium was a multicenter, randomized clinical trial, conducted between September 1997 and November 1999, designed to compare the effects on blood pressure of three levels of dietary sodium and two diet patterns. The study design incorporated a parallel, two-group, comparison of diet (DASH diet vs. control diet) together with a three-period crossover of the three levels of dietary sodium intake, with a primary outcome of mean systolic blood pressure (Figure 1). The three sodium levels were 1) "high" (150 mmol, at 2100 Kcal caloric intake), reflecting average consumption in the USA, 2) "intermediate" (100 mmol) reflecting the upper limit of current recommendations for adults [26], and 3) "low" (50 mmol). The DASH diet is rich in fruits, vegetables, and low-fat dairy products, high in dietary fiber, potassium, calcium and magnesium, moderately high in protein, and low in saturated fat, cholesterol, and total fat. The control diet is typical of what many in the Western world eat.

Study participants were 412 adults (age  $\geq 22$  years) with systolic blood pressure between 120 and 159 mm Hg and diastolic blood pressure between 80 and 95 mm Hg (i.e., pre-hypertension or stage 1 hypertension). Major exclusion criteria were diabetes mellitus, evidence of active malignancy, history of cardiovascular event (angina, myocardial infarction, angioplasty, or stroke), renal insufficiency (serum creatinine  $> 1.2$  mg/dL for females or 1.5 mg/dL for males), anemia (hematocrit at least 5 percent below normal range), pregnancy, inflammatory bowel disease, body mass index  $> 40$  kg/m<sup>2</sup>, use of antihypertensive drugs and corticosteroids, and consumption of more than 14 alcoholic beverages per week.

1 Three screening visits (each separated by at least seven days) were conducted to assess general  
2 eligibility and to collect baseline data. Following the screening visits, eligible participants started a two-  
3 week run-in feeding period during which they ate the control diet at the high sodium level. The run-in  
4 feeding period was designed to exclude participants who were unlikely to comply with the dietary  
5 requirements and to estimate caloric requirements needed to maintain weight. Participants were then  
6 randomly assigned (generated using desktop PC at each coordinating center) to one of the two diets  
7 using a parallel-group design, and ate each of three sodium levels (feeding periods) for 30 days each, in  
8 a randomized crossover design. The sodium feeding periods were separated by feeding breaks of up to 5  
9 days in duration, which were not intended as “washout” periods. Participants were not notified of their  
10 assigned dietary pattern or sodium sequence.  
11  
12  
13  
14  
15  
16  
17  
18  
19  
20  
21  
22  
23  
24  
25  
26  
27  
28

29 During feeding periods (run-in and intervention), participants were required to eat at least one meal per  
30 day on site at the clinical center, five days per week, and to take food home for other meals. Participants  
31 were expected to eat all of their food and were instructed to record the type and amount of any uneaten  
32 study food. Caffeinated beverages and alcohol were limited and monitored. Individual energy intake  
33 (calorie content) was adjusted so that each participant's weight during each feeding period remained  
34 stable.  
35  
36  
37  
38  
39  
40  
41  
42  
43  
44  
45  
46  
47

48 Data collection staff were masked to randomized sodium and diet sequence. Measurements were  
49 obtained during screening and at the end of each feeding period. Blood pressure was measured in a  
50 seated position, using the right arm of participants. Twenty-four hour urine (for analysis of sodium,  
51 potassium, urea nitrogen, and creatinine) and body weight were also collected. Compliance with the  
52  
53  
54  
55  
56  
57  
58  
59  
60

1 feeding protocol was assessed by urinary excretion of sodium, potassium, phosphorus, urea nitrogen,  
2  
3 and creatinine, estimated from 24 hour urine collections.  
4  
5  
6  
7  
8  
9

10 Symptoms (side effects) including headache, bloating, dry mouth, excessive thirst, fatigue or low  
11 energy, lightheadedness, nausea, and change in taste, were collected via self-administered questionnaires  
12 (see Supplement) completed during the last seven days of each sodium feeding period. For each  
13 symptom, potential responses were (1) "none" for not experiencing any symptom, (2) "mild" if symptom  
14 occurred but did not interfere with usual activities, (3) "moderate" if symptom occurred and somewhat  
15 interfered with usual activities, and (4) "severe" if participants were unable to perform usual activities  
16 due to the symptom.  
17  
18  
19  
20  
21  
22  
23  
24  
25  
26  
27  
28  
29  
30

31 This analysis of the DASH-Sodium trial included 390 (95%) of the 412 randomized participants.  
32 Excluded participants were those with missing information on headaches in any of the 3 feeding periods.  
33 For the primary analysis in this study, headache was defined as "any headache" (mild, moderate or  
34 severe) during the last seven days of each feeding period. Subsequently, we report frequency of  
35 headache by severity.  
36  
37  
38  
39  
40  
41  
42  
43  
44  
45  
46  
47  
48  
49

50 The means and proportions between groups were explored using t-tests and chi-square tests,  
51 respectively. A non-parametric test ([extension of Wilcoxon rank-sum test](#)) was used for trends in the  
52 frequency of headache by sodium intake. Since multiple observations were obtained on each participant,  
53 we used generalized estimating equation models [27], with a logit link and binomial error and an  
54 exchangeable covariance structure, to model the odds of a headache. [The adjusted covariates used in this](#)  
55  
56  
57  
58  
59  
60



1 analysis were measured at baseline. Models were adjusted for age, sex, race, clinical site, systolic blood  
2  
3 pressure, body mass index, and smoking status. The potential for carryover effects was unavoidable in  
4 this trial, however, since the experimental agent was one's diet and participants must eat something  
5 during these intervals, statistical (GEE) models were also adjusted for carry-over effects from the  
6 previous periods. To address the qualitative consistency and benefit-hazard profiles between  
7  
8 participants, subgroup analysis by diet stratified by age, sex, race, obesity ( $\text{BMI} \geq 30 \text{ kg/m}^2$  v not) and  
9  
10 hypertension (blood pressure  $\geq 140/90$  mmHg v not) status at baseline were also performed. Interactions  
11  
12 between subgroups were tested by the addition of an interaction term to the main effects model.  
13  
14  
15  
16  
17  
18  
19  
20  
21

22  
23  
24  
25 Institutional review boards at the participating centers and an external data and safety monitoring  
26  
27 committee approved the trial protocol and consent procedures. Each participant provided written,  
28  
29 informed consent.  
30  
31  
32

33  
34  
35  
36  
37 A p-value of  $\leq 0.05$  was considered statistically significant. All analyses were performed using Stata  
38  
39 version 12.1 (Stata Corp LP, College Station, Texas, USA).  
40  
41  
42  
43  
44  
45

## 46 **Results**

47  
48  
49  
50 The 390 participants included in our analyses were those with completed symptoms questionnaires - 192  
51  
52 (94%) of the 204 participants assigned to the control diet and 198 (95%) of the 208 participants assigned  
53  
54 to the DASH diet. Clinical and demographic characteristics of the two groups were similar (Table 1).  
55  
56  
57  
58  
59  
60

1  
2  
3  
4  
5 Figure 2 displays the distribution of headaches by sodium level and assigned diet. The highest  
6  
7 occurrence of headache was reported by participants on the control diet with high sodium (47%) and the  
8  
9 lowest by participants on the DASH diet with low sodium level (36%). On both diets, the number of  
10  
11 headaches reported was greatest for the high sodium level and least on the low sodium level.  
12  
13

14  
15  
16  
17  
18  
19 Among those assigned to the control diet, mean (SD) urinary sodium excretion was 141 (55), 106 (43)  
20  
21 and 64 (37) mmol per 24 hours during the high, intermediate, and low sodium feeding periods,  
22  
23 respectively. In the DASH diet group, mean (SD) urinary sodium levels were 144 (57), 107 (52) and 67  
24  
25 (46) mmol per 24 hour during the high, intermediate, and low sodium feeding periods, respectively. On  
26  
27 each sodium level, mean urinary sodium excretion was similar in those assigned to the two diets (each  $p$   
28  
29  $> 0.05$ ). Mean urinary potassium and urea nitrogen were higher in the DASH diet group, reflecting the  
30  
31 higher vegetable, dairy, and protein content of the DASH diet compared with the control diet, at each  
32  
33 sodium level (Table 2).  
34  
35  
36  
37  
38  
39  
40  
41  
42

43 Table 3 shows differences in the odds of headache by diet and sodium level. Compared to the high  
44  
45 sodium level, we observed a lower odds of any headache during the low sodium period both on the  
46  
47 control diet (adjusted OR: 0.69, 95% CI: 0.49-0.99) and the DASH diet (adjusted OR: 0.69, 95% CI:  
48  
49 0.49-0.98). Although the relationship appeared graded (Figure 2), there was no significant difference  
50  
51 between the intermediate level of sodium and either the low or high sodium levels, on either diet. There  
52  
53 was no significant association of diet pattern (DASH vs. Control) with headache on any sodium level.  
54  
55 There was also no significant interaction between diet and sodium on the occurrence of headaches ( $p$ -  
56  
57  
58  
59  
60

1 interaction  $> 0.05$ ). Compared to the control diet with high sodium, there was a reduced risk of a  
2  
3  
4 headache on the DASH diet with low sodium (adjusted OR = 0.64, 95% CI: 0.41 – 0.99,  $p = 0.05$ ).  
5  
6  
7  
8  
9  
10

11  
12  
13  
14 While on control diet, the number of persons who reported a severe headache was 4 (2.1%) during high,  
15  
16 1 (0.5%) during intermediate, and 1 (0.5%) during low sodium periods, respectively ( $p$  for trend = 0.13).  
17  
18 On DASH diet, the corresponding number of persons who reported a severe headache was 8 (4%)  
19  
20 during high, 2 (1%) during intermediate, and 3 (1.5%) during low sodium periods, respectively ( $p$  for  
21  
22 trend= 0.08). The frequency of severe headache was similar ( $p = 0.3$ ) by diet [DASH 8 (4%) and control  
23  
24 4 (2%)] during high sodium feeding period. (Table 4)  
25  
26  
27  
28  
29  
30  
31  
32

33 There was no evidence that the relationship between sodium levels and headache was modified by age,  
34  
35 sex, race, baseline BMI or blood pressure (Figure 3).  
36  
37  
38  
39  
40  
41  
42

## 43 Discussion

44  
45

46 In this secondary analysis of the DASH-Sodium trial, which enrolled adults with pre- and stage 1  
47  
48 hypertension, a reduced dietary sodium intake was associated with a lower risk of headache, both on the  
49  
50 control diet and the DASH diet. In contrast, the risk of headache was similar on the DASH and control  
51  
52 diets.  
53  
54  
55  
56  
57  
58  
59  
60

1 The epidemiological literature on headaches in adults is limited [1, 2, 6]. However, it is well-recognized  
2 that, compared to normotensive individuals, individuals with hypertension have a higher frequency of  
3 headaches [16-19, 28]. Of note, Cooper *et al* reported a direct relationship of headaches with both  
4 systolic and diastolic blood pressure [17]. As regards trials, in a pooled analysis that included seven  
5 double-blinded, randomized placebo controlled trials of Ibesartan therapy, Hansson *et al* found a direct  
6 relationship of diastolic blood pressure with incident headaches in 2673 patients with mild to moderate  
7 hypertension [29].  
8  
9  
10  
11  
12  
13  
14  
15  
16  
17  
18  
19  
20  
21

22 The association between dietary sodium intake and blood pressure is also well recognized [30, 31]. The  
23 DASH diet alone and in combination with reduced sodium intake lowers blood pressure in patients with  
24 or without hypertension [20, 21]. It is noteworthy that there was no significant relationship between diet  
25 pattern and headache. This suggests that a process that is independent of a blood pressure may mediate  
26 the relationship between sodium and headaches.  
27  
28  
29  
30  
31  
32  
33  
34  
35  
36  
37

38 Our results contrast with the popular belief that a diet rich in fruits, vegetables and potassium and low in  
39 saturated and total fat may ease the frequency, or even prevent, headache [32]. Several dietary factors,  
40 including fasting, alcoholic drinks, chocolate, coffee, and cheese, appear to trigger vascular headache  
41 (cluster or migraine) in adults [33- 36]. In some studies, an increased intake of monosodium glutamate is  
42 associated with the occurrence of headaches [22-24]. However, a recent review concluded that evidence  
43 on the relationship of sodium glutamate intake and headaches is inconsistent [37]. In one study of 200  
44 adults (mean age 37.7 years, 81% females), monosodium glutamate was identified as a trigger for  
45 migraine headache in only 5 (2.5%) of study participants [36]. However, data on the relationship  
46 between sodium intake and any form of headaches are sparse.  
47  
48  
49  
50  
51  
52  
53  
54  
55  
56  
57  
58  
59  
60

1  
2  
3  
4  
5 The results of this study provide encouraging evidence in support of dietary recommendations to lower  
6  
7 sodium intake: recommendations which are currently based on the relationship of sodium intake with  
8  
9 blood pressure. The daily intake of sodium in adults living in the United States is already in excess of  
10  
11 their physiological need and for many individuals, is much higher than the highest level tested in this  
12  
13 study [38, 39]. Our results also support the recent World Health Organization guidelines for reducing  
14  
15 sodium intake to less than 87 mmol/day [40] and American Heart Association guidelines for reducing  
16  
17 sodium intake to 65 mmol/day [31].  
18  
19  
20  
21  
22  
23  
24  
25

26 Strengths of our study include its randomized controlled design comparing two diets using a parallel  
27  
28 design and a three-period crossover of three levels of dietary sodium (high, intermediate, and low).  
29  
30 Dietary intake during the feeding periods was closely monitored and vigorous efforts were made to  
31  
32 promote adherence with assigned diets. The participants of this study were healthy, non-  
33  
34 institutionalized, racially diverse, middle- and older-aged men and women. Hence we believe that these  
35  
36 results are applicable to a large fraction of adults.  
37  
38  
39  
40  
41  
42  
43

44 Our study also has limitations. Information on the prevalence of headache at baseline from eligible  
45  
46 participants was lacking. In addition, there was no information about the type of headache (tension,  
47  
48 cluster or migraine) experienced by study participants. However, we suspect that most of the headaches  
49  
50 were tension headaches. Whether a reduced sodium intake can prevent vascular headache is unknown.  
51  
52 Second, the instrument was administered just once in each feeding period and does not allow calculation  
53  
54 of an event rate, such as person-days of headaches. Third, these are secondary, post-hoc analyses from a  
55  
56 trial that was not explicitly designed to test the effects of dietary factors on headaches. Nonetheless, a  
57  
58  
59  
60

1 rigorously controlled feeding study designed to test the effects of dietary factors on occurrence of  
2  
3 headaches would be extremely expensive and logistically challenging. Fourth, our results likely  
4  
5 underestimate the relationship of sodium intake with headaches. The range of sodium intake was  
6  
7 relatively narrow - the highest sodium group in our trial actually corresponds to the average in the USA  
8  
9 and is much lower than the intake in many countries, particularly in Asia. Self-report of symptoms is  
10  
11 inherently imprecise and could bias results to the null, given that a validated instrument was not used for  
12  
13 patient-reported headache.  
14  
15  
16  
17  
18  
19  
20  
21  
22  
23  
24

25 In conclusion, a reduced sodium intake was associated with significantly lower risk of headache, while  
26  
27 diet patterns had no effect on the risk of headaches. A reduced dietary sodium intake offers a novel  
28  
29 approach to prevent headache in adults. Additional studies are needed to replicate these findings and to  
30  
31 explore mechanisms that mediate the association between sodium intake and headache.  
32  
33  
34  
35  
36  
37  
38  
39  
40  
41  
42  
43  
44  
45  
46  
47  
48  
49  
50  
51  
52  
53  
54  
55  
56  
57  
58  
59  
60

1  
2  
3  
4  
5  
6  
7  
8  
9  
10  
11 **Contribution statement:** All three authors (Muhammad Amer, Mark Woodward, and Lawrence  
12 Appel) have -substantially contributed to the conception, equally participated in the drafting, and editing  
13 and revising for the important intellectual content of the manuscript. Muhammad Amer and Mark  
14 Woodward were responsible for -did analyses of the data. All three authors participated in the  
15 interpretation of the analysis and agreed for the final approval of the version to be published. Authors  
16 are in agreement to be accountable for all aspects of the work related to this manuscript and responsible  
17 for the integrity of any part of the work shown in this post-hoc analysis of the DASH-Sodium clinical  
18 trial.  
19  
20  
21  
22  
23  
24  
25  
26  
27  
28  
29  
30

31 **Competing interests:** None reported by any author  
32  
33

34 **Funding:** This study received no specific grant from any funding agency.  
35  
36

37 **Data sharing:** No additional data available to share.  
38  
39  
40  
41  
42  
43  
44  
45  
46  
47  
48  
49  
50  
51  
52  
53  
54  
55  
56  
57  
58  
59  
60

## References

- 1- Benbir G, Karadeniz D, Göksan B. The characteristics and subtypes of headache in relation to age and gender in a rural community in Eastern Turkey. *Agri*. 2012 Oct; 24(4):145-52
- 2- Stovner Lj, Hagen K, Jensen R et al. The global burden of headache: a documentation of headache prevalence and disability worldwide. *Cephalalgia*. 2007 Mar; 27(3):193-210.
- 3- Andlin-Sobocki P, Jönsson B, Wittchen HU, Olesen J. Cost of disorders of the brain in Europe. *Eur J Neurol*. 2005 Jun; 12 Suppl 1:1-27
- 4- Jensen R, Stovner LJ. Epidemiology and comorbidity of headache. *Lancet Neurol*. 2008 Apr; 7(4):354-61.
- 5- Zwart JA, Dyb G, Holmen TL, Stovner LJ, Sand T. The prevalence of migraine and tension-type headaches among adolescents in Norway: The Nord- Trøndelag Health Study (Head-Hunt). *Cephalalgia*. 2004 May; 24(5):373-9
- 6- Rasmussen BK. Epidemiology of headache. *Cephalalgia*. 2001 Sep; 21(7):774-7.
- 7- Berg J, Stovner LJ. Cost of migraine and other headaches in Europe. *Eur J Neurol* 2005; 12 (suppl 1): 59–62.
- 8- Rasmussen BK, Jensen R, Olesen J. Impact of headache on sickness absence and utilisation of medical services: a Danish population study. *J Epidemiol Community Health* 1992; 46: 443–46
- 9- Lyngberg AC, Rasmussen BK, Jensen R, et al. Secular changes in health care utilization and work absence for migraine and tension type headache. A population based study. *J Epidemiol Com Health* 2005; 20: 1007–14.
- 10- Von Korff M, Stewart W, Lipton RB. Assessing headache severity: new directions. *Neurology* 1998; 44 (Suppl 4):40–6.



- 1  
2  
3  
4  
5  
6  
7  
8  
9  
10  
11  
12  
13  
14  
15  
16  
17  
18  
19  
20  
21  
22  
23  
24  
25  
26  
27  
28  
29  
30  
31  
32  
33  
34  
35  
36  
37  
38  
39  
40  
41  
42  
43  
44  
45  
46  
47  
48  
49  
50  
51  
52  
53  
54  
55  
56  
57  
58  
59  
60
- 11- Michel P, Dartiques J, Duru G, Moreau J, Salamon R, Henry P. Incremental absenteeism due to headache in migraine: results from the Mig-Access French National Cohort. *Cephalalgia*. 1999 Jun; 19(5):503-10.
- 12- Vinding GR, Zeeberg P, Lyngberg A, Nielsen RT, Jensen R. The burden of headache in a patient population from a specialized headache centre. *Cephalalgia*. 2007 Mar; 27(3):263-70.
- 13- Medizabel JE, Rothrock JF. An interregional comparative study of headache clinic populations. *Cephalalgia*. 1998 Jan; 18(1):57-9.
- 14- Saper JR, Lake AE, Madden SF, Kreeger C. Comprehensive/tertiary care for headache: a 6-month outcome study. *Headache*. 1999 Apr; 39(4):249-63.
- 15- Bussone G, Usai S, Grazzi L, Rigamonti A, Solari A, D'Amico D. Disability and quality of life in different primary headaches: results from Italian studies. *Neurol Sci*. 2004 Oct; 25 Suppl 3:S105-7.
- 16- Kruszewski P, Bieniaszewski L, Neubauer J, Krupa-Wojciechowska B. Headache in patients with mild to moderate hypertension is generally not associated with simultaneous blood pressure elevation. *J Hypertens*. 2000 Apr; 18(4):437-44.
- 17- Cooper WD, Glover DR, Hormbrey JM, Kimber GR. Headache and blood pressure: evidence of a close relationship. *J Hum Hypertens*. 1989 Feb; 3(1):41-4.
- 18- Janeway TC. A clinical study of hypertensive cardiovascular disease. *Arch Intern Med*. 1913; 12: 755-798
- 19- Barlow DH, Beevers DG, Hawthorne VM, Watt HD, Young GA. Blood pressure measurement at screening and in general practice. *Br Heart J*. 1977 Jan; 39(1):7-12.
- 20- Appel LJ, Moore TJ, Obarzanek E et al. A clinical trial of the effects of dietary patterns on blood pressure. DASH Collaborative Research Group. *N Engl J Med*. 1997 Apr 17; 336(16):1117-24.
- 21- Sacks FM, Svetkey LP, Vollmer WM et al; DASH-Sodium Collaborative Research Group. Effects on blood pressure of reduced dietary sodium and the Dietary Approaches to Stop

- 1 Hypertension (DASH) diet. DASH-Sodium Collaborative Research Group. N Engl J Med. 2001  
2  
3  
4 Jan 4;344(1):3-10  
5
- 6 22- Yang WH, Drouin MA, Herbert M, Mao Y, Karsh J. The monosodium glutamate symptom  
7  
8 complex: assessment in a double-blind, placebo-controlled, randomized study. J Allergy Clin  
9  
10 Immunol. 1997 Jun; 99(6 Pt 1):757-62.  
11
- 12 23- Randolph TG, Rollins JP. Beet sensitivity: allergic reactions from the ingestion of beet sugar  
13  
14 (sucrose) and monosodium glutamate of beet origin. J Lab Clin Med 1950; 36:407-17.  
15
- 16 24- Ratner D, Eshel E, Shoshani E. Adverse effects of monosodium glutamate: a diagnostic problem.  
17  
18 Israel J Med Sci 1984;20:252-3  
19
- 20 25- Svetkey LP, Sacks FM, Obarzanek E et al. The DASH Diet, Sodium Intake and Blood Pressure  
21  
22 Trial (DASH-sodium): rationale and design. DASH-Sodium Collaborative Research Group. J  
23  
24 Am Diet Assoc. 1999 Aug; 99(8 Suppl):S96-104.  
25  
26  
27  
28  
29
- 30 26- The sixth report of the Joint National Committee on Prevention, Detection, Evaluation, and  
31  
32 Treatment of High Blood Pressure. Arch Intern Med 1997; 157: 2413-46. [Erratum, Arch Intern  
33  
34 Med 1998; 158:573.  
35
- 36 27- Liang K-Y, Zeger SL. Longitudinal data analysis using generalized linear models. Biometrika  
37  
38 1986;73:13-22  
39
- 40 28- Sigurdsson JA, Bengtsson C. Symptoms and signs in relation to blood pressure and  
41  
42 antihypertensive treatment. A cross-sectional and longitudinal population study of middle-aged  
43  
44 Swedish women. Acta Med Scand. 1983; 213(3):183-90.  
45  
46  
47
- 48 29- Hansson L, Smith DH, Reeves R, Lapuerta P. Headache in mild-to-moderate hypertension and  
49  
50 its reduction by irbesartan therapy. Arch Intern Med. 2000 Jun 12; 160 (11):1654-8.  
51
- 52 30- Aburto NJ, Ziolkovska A, Hooper L, Elliott P, Cappuccio FP, Meerpohl JJ. Effect of lower  
53  
54 sodium intake on health: systematic review and meta-analyses. BMJ. 2013 Apr 3; 346:f1326.  
55  
56  
57  
58  
59  
60

- 1  
2  
3  
4  
5  
6  
7  
8  
9  
10  
11  
12  
13  
14  
15  
16  
17  
18  
19  
20  
21  
22  
23  
24  
25  
26  
27  
28  
29  
30  
31  
32  
33  
34  
35  
36  
37  
38  
39  
40  
41  
42  
43  
44  
45  
46  
47  
48  
49  
50  
51  
52  
53  
54  
55  
56  
57  
58  
59  
60
- 31- Appel LJ, Brands MW, Daniels SR, Karanja N, Elmer PJ, Sacks FM; American Heart Association. Dietary approaches to prevent and treat hypertension: a scientific statement from the American Heart Association. *Hypertension*. 2006 Feb; 47(2):296-308.
- 32- Buchholz, David. *Heal Your Headache: The 1-2-3 Program for Taking Charge of Your Headaches*. New York: Workman, 2002.
- 33- Savi L, Rainero I, Valfrè W, Gentile S, Lo Giudice R, Pinessi L. Food and headache attacks. A comparison of patients with migraine and tension-type headache. *Panminerva Med*. 2002 Mar; 44(1):27-31.
- 34- Peatfield RC. Relationships between food, wine, and beer-precipitated migrainous headaches. *Headache*. 1995 Jun; 35(6):355-7.
- 35- Carod-Artal FJ, Ezpeleta D, Martín-Barriga ML, Guerrero AL. Triggers, symptoms, and treatment in two populations of migraineurs in Brazil and Spain. A cross-cultural study. *J Neurol Sci*. 2011 May 15; 304(1-2):25-8.
- 36- Fukui PT, Gonçalves TR, Strabelli CG et al. Trigger factors in migraine patients. *Arq Neuropsiquiatr*. 2008 Sep; 66(3A):494-9.
- 37- Freeman M. Reconsidering the effects of monosodium glutamate: a literature review. *J Am Acad Nurse Pract*. 2006 Oct; 18(10):482-6.
- 38- Brown IJ, Tzoulaki I, Candeias V, Elliott P. Salt intakes around the world: implications for public health. *Int J Epidemiol*. 2009 Jun; 38(3):791-813.
- 39- National Center for Chronic Disease Prevention and Health Promotion Division for Heart Disease and Stroke Prevention Fact sheet; [http://www.cdc.gov/salt/pdfs/Sodium\\_Fact\\_Sheet.pdf](http://www.cdc.gov/salt/pdfs/Sodium_Fact_Sheet.pdf). Accessed September 28, 2013.
- 40- WHO. *Guideline: Sodium intake for adults and children*. Geneva, World Health Organization (WHO), 2012.

**Table 1: Baseline characteristics of participants in DASH-Sodium trial**  
**[Number (percentage) or mean (standard deviation)]**

| <u>Characteristic</u>                      | <u>Control<br/>Diet<br/>(n=192)</u> | <u>DASH<br/>Diet<br/>(n=198)</u> | <u>Total<br/>(n=390)</u> |
|--------------------------------------------|-------------------------------------|----------------------------------|--------------------------|
| <u>Age (years)</u>                         | <u>49 (10)</u>                      | <u>47 (10)</u>                   | <u>48 (10)</u>           |
| <u>Females, n (%)</u>                      | <u>104 (54)</u>                     | <u>118 (60)</u>                  | <u>222 (57)</u>          |
| <u>Race, n (%)</u>                         |                                     |                                  |                          |
| <u>Caucasian</u>                           | <u>78 (41)</u>                      | <u>81 (41)</u>                   | <u>159 (41)</u>          |
| <u>African American</u>                    | <u>109 (57)</u>                     | <u>114 (57)</u>                  | <u>223 (57)</u>          |
| <u>Other</u>                               | <u>5 (3)</u>                        | <u>3 (2)</u>                     | <u>8 (2)</u>             |
| <u>Body Mass Index, (kg/m<sup>2</sup>)</u> | <u>30 (5)</u>                       | <u>29 (5)</u>                    | <u>29.2 (5)</u>          |
| <u>Systolic Blood Pressure (mm Hg)</u>     | <u>135 (9)</u>                      | <u>134 (9)</u>                   | <u>135 (9)</u>           |
| <u>Diastolic Blood Pressure (mm Hg)</u>    | <u>86 (4)</u>                       | <u>85 (5)</u>                    | <u>86 (4)</u>            |
| <u>Hypertension, n (%) †</u>               | <u>76 (40)</u>                      | <u>79 (40)</u>                   | <u>155 (40)</u>          |
| <u>Current Smoker, n (%)</u>               | <u>21 (11)</u>                      | <u>21 (11)</u>                   | <u>42 (11)</u>           |

†Hypertension was defined as an average systolic blood pressure of 140 mm of Hg or an average diastolic blood pressure of 90 mmHg during the three screening visits.

**Table 2: Urinary excretion according to sodium level and diet**  
**[Mean (standard deviation)]**

|                             | <u>Level of sodium</u>        |                                  |                               |                                  |                               |                                  |
|-----------------------------|-------------------------------|----------------------------------|-------------------------------|----------------------------------|-------------------------------|----------------------------------|
|                             | <u>High</u>                   |                                  | <u>Intermediate</u>           |                                  | <u>Low</u>                    |                                  |
|                             | <u>DASH</u><br><u>(n=198)</u> | <u>Control</u><br><u>(n=192)</u> | <u>DASH</u><br><u>(n=198)</u> | <u>Control</u><br><u>(n=192)</u> | <u>DASH</u><br><u>(n=198)</u> | <u>Control</u><br><u>(n=192)</u> |
| <b><u>Sodium</u></b>        |                               |                                  |                               |                                  |                               |                                  |
| <u>gram/day</u>             | <u>3.3 (1.3)</u>              | <u>3.2 (1.3)</u>                 | <u>2.5 (1.2)</u>              | <u>2.4 (0.9)</u>                 | <u>1.5 (1.1)</u>              | <u>1.5 (0.8)</u>                 |
| <u>mmol/day</u>             | <u>144 (57)</u>               | <u>141 (55)</u>                  | <u>107 (52)</u>               | <u>106 (43)</u>                  | <u>67 (46)</u>                | <u>64 (37)</u>                   |
| <b><u>Potassium</u></b>     |                               |                                  |                               |                                  |                               |                                  |
| <u>gram/day</u>             | <u>3.0 (1.1)</u>              | <u>1.6 (0.5)</u>                 | <u>3.2 (1.2)</u>              | <u>1.6 (0.5)</u>                 | <u>3.2 (1.1)</u>              | <u>1.6 (0.5)</u>                 |
| <u>mmol/day</u>             | <u>76 (27)</u>                | <u>40 (14)</u>                   | <u>82 (31)</u>                | <u>41 (14)</u>                   | <u>81 (29)</u>                | <u>41 (14)</u>                   |
| <b><u>Urea Nitrogen</u></b> |                               |                                  |                               |                                  |                               |                                  |
| <u>gram/day</u>             | <u>11.5 (4)</u>               | <u>9.5 (3.2)</u>                 | <u>12.4 (4.5)</u>             | <u>9.7 (3.4)</u>                 | <u>12 (4)</u>                 | <u>10 (3.3)</u>                  |
| <b><u>Creatinine</u></b>    |                               |                                  |                               |                                  |                               |                                  |
| <u>gram/day</u>             | <u>1.4 (0.5)</u>              | <u>1.5 (0.5)</u>                 | <u>1.5 (0.6)</u>              | <u>1.5 (0.6)</u>                 | <u>1.4 (0.5)</u>              | <u>1.5 (0.6)</u>                 |

**Table 3: Odds ratio of headaches by diet and sodium sequence**

|                                                                   | <b>Odds ratio (95 %CI)</b>     | <b>p value</b>     |
|-------------------------------------------------------------------|--------------------------------|--------------------|
| <b><u>Sodium effects on the DASH diet</u></b>                     |                                |                    |
| <u>Intermediate v high sodium</u>                                 | <u>0.72 (0.51-1.01)</u>        | <u>0.06</u>        |
| <u>Low v intermediate sodium</u>                                  | <u>0.96 (0.68-1.37)</u>        | <u>0.85</u>        |
| <u>Low v high sodium</u>                                          | <u>0.69 (0.49-0.98)</u>        | <u>0.04</u>        |
| <b><u>Sodium effects on the control diet</u></b>                  |                                |                    |
| <u>Intermediate v high sodium</u>                                 | <u>0.81 (0.57-1.15)</u>        | <u>0.24</u>        |
| <u>Low v intermediate sodium</u>                                  | <u>0.86 (0.59-1.24)</u>        | <u>0.42</u>        |
| <u>Low v high sodium</u>                                          | <u>0.69 (0.49-0.99)</u>        | <u>0.05</u>        |
| <b><u>Diet effects (DASH vs Control) at each sodium level</u></b> |                                |                    |
| <u>On high sodium</u>                                             | <u>0.65 (0.37-1.12)</u>        | <u>0.12</u>        |
| <u>On intermediate sodium</u>                                     | <u>0.57 (0.29-1.12)</u>        | <u>0.10</u>        |
| <u>On low sodium</u>                                              | <u>0.64 (0.36-1.13)</u>        | <u>0.12</u>        |
| <b><u>Low Sodium on DASH vs High Sodium on Control</u></b>        | <b><u>0.64 (0.14-0.99)</u></b> | <b><u>0.05</u></b> |

Models adjusted for age, sex, race, site, systolic blood pressure, BMI, smoking status and carry over effects from the previous period. CI =confidence interval.

**Table 4: Occurrence and severity of headache by sodium level and diet, n (%)**

|                 | <u>Level of sodium</u>        |                                  |                               |                                  |                               |                                  |
|-----------------|-------------------------------|----------------------------------|-------------------------------|----------------------------------|-------------------------------|----------------------------------|
|                 | <u>High</u>                   |                                  | <u>Intermediate</u>           |                                  | <u>Low</u>                    |                                  |
|                 | <u>DASH</u><br><u>(n=198)</u> | <u>Control</u><br><u>(n=192)</u> | <u>DASH</u><br><u>(n=198)</u> | <u>Control</u><br><u>(n=192)</u> | <u>DASH</u><br><u>(n=198)</u> | <u>Control</u><br><u>(n=192)</u> |
| <u>Mild</u>     | <u>60 (30)</u>                | <u>70 (36)</u>                   | <u>43 (22)</u>                | <u>62 (32)</u>                   | <u>53 (27)</u>                | <u>53 (28)</u>                   |
| <u>Moderate</u> | <u>17 (9)</u>                 | <u>17 (9)</u>                    | <u>31 (16)</u>                | <u>16 (8)</u>                    | <u>16 (8)</u>                 | <u>21 (11)</u>                   |
| <u>Severe</u>   | <u>8 (4)</u>                  | <u>4 (2)</u>                     | <u>2 (1)</u>                  | <u>1 (0.5)</u>                   | <u>3 (1)</u>                  | <u>1 (0.5)</u>                   |

1  
2  
3 **FIGURE LEGEND:**  
4

5  
6 **Figure 1:** DASH-Sodium Trial Flow Diagram  
7

8  
9 **Figure 2:** Frequency of headache by diet and sodium level.  
10

11  
12  
13 **Figure 3**  
14

15  
16 **(a):** Odds of headache (low vs high sodium) by subgroup, in the DASH diet  
17

18  
19 **(b):** Odds of headache (low vs high sodium) by subgroup, in the Control diet  
20  
21  
22  
23  
24  
25  
26  
27  
28  
29  
30  
31  
32  
33  
34  
35  
36  
37  
38  
39  
40  
41  
42  
43  
44  
45  
46  
47  
48  
49  
50  
51  
52  
53  
54  
55  
56  
57  
58  
59  
60



1  
2  
3  
4  
5  
6  
7  
8  
9  
10  
11  
12  
13  
14  
15  
16  
17  
18  
19  
20  
21  
22  
23  
24  
25  
26  
27  
28  
29  
30  
31  
32  
33  
34  
35  
36  
37  
38  
39  
40  
41  
42  
43  
44  
45  
46  
47  
48  
49  
50  
51  
52  
53  
54  
55  
56  
57  
58  
59  
60

Figure 1: DASH-Sodium Trial Flow Diagram

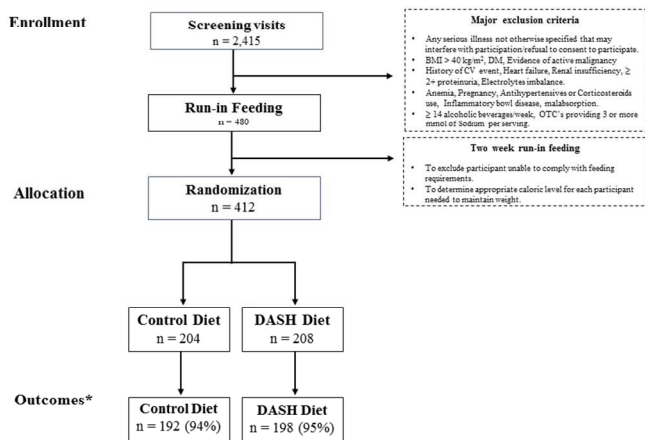

\*Participants with complete questionnaire data on headaches in all 3 periods.

338x190mm (96 x 96 DPI)

review only

1  
2  
3  
4  
5  
6  
7  
8  
9  
10  
11  
12  
13  
14  
15  
16  
17  
18  
19  
20  
21  
22  
23  
24  
25  
26  
27  
28  
29  
30  
31  
32  
33  
34  
35  
36  
37  
38  
39  
40  
41  
42  
43  
44  
45  
46  
47  
48  
49  
50  
51  
52  
53  
54  
55  
56  
57  
58  
59  
60

Figure 2: Frequency of headache by diet and sodium level

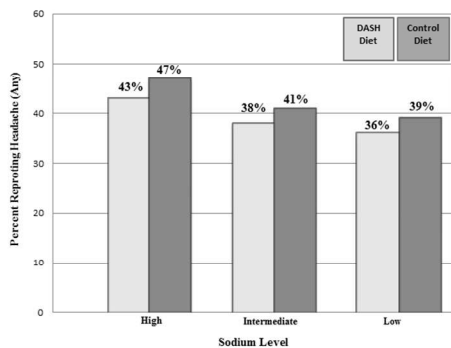

338x190mm (96 x 96 DPI)

review only

1  
2  
3  
4  
5  
6  
7  
8  
9  
10  
11  
12  
13  
14  
15  
16  
17  
18  
19  
20  
21  
22  
23  
24  
25  
26  
27  
28  
29  
30  
31  
32  
33  
34  
35  
36  
37  
38  
39  
40  
41  
42  
43  
44  
45  
46  
47  
48  
49  
50  
51  
52  
53  
54  
55  
56  
57  
58  
59  
60

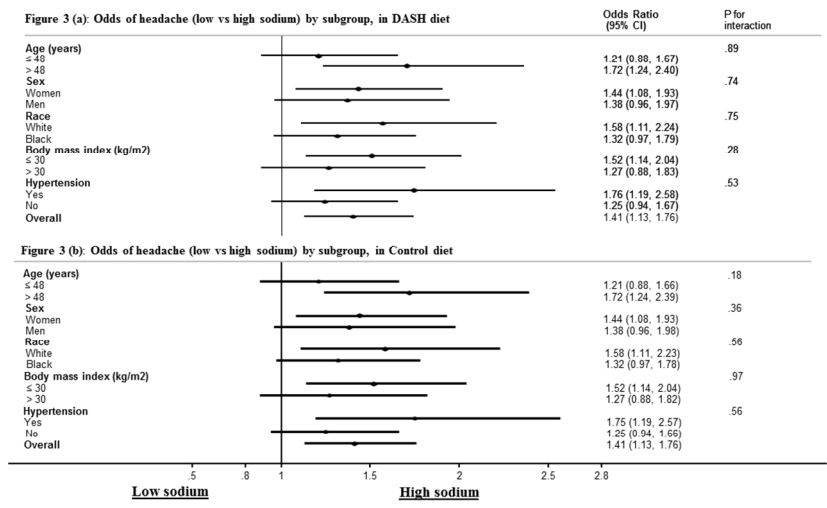

338x190mm (96 x 96 DPI)

review only

## Analysis Guide

January 31, 2001

### DATASET: SIDEEFF

Side effects (symptoms) data. One record per randomized participant per visit (collected at SV3, RI, IV1, IV2 and IV3). Use AN\_ID as the participant ID for all Data Release Requests and for all analysis data sets that leave CHR.

| Variable  | Description                      | Format    | Range | Notes                                                                                      |
|-----------|----------------------------------|-----------|-------|--------------------------------------------------------------------------------------------|
| AN_ID     | id for analysis datasets         | text      |       | Numeric portion of original alphanumeric ID. First digit identifies clinic site.           |
| APPETITE  | poor appetite                    | severity* | 1 - 4 | = 1 if did not occur, = 2 if mild, = 3 if moderate, = 4 if severe                          |
| BLOATING  | bloating / uncomfortably full    | severity* | 1 - 4 | included in GI symptoms, = 1 if did not occur, = 2 if mild, = 3 if moderate, = 4 if severe |
| CONSTIP   | constipation                     | severity* | 1 - 4 | included in GI symptoms, = 1 if did not occur, = 2 if mild, = 3 if moderate, = 4 if severe |
| DIARRHEA  | diarrhea / loose stools          | severity* | 1 - 4 | included in GI symptoms, = 1 if did not occur, = 2 if mild, = 3 if moderate, = 4 if severe |
| DRY MOUTH | dry mouth                        | severity* | 1 - 4 | = 1 if did not occur, = 2 if mild, = 3 if moderate, = 4 if severe                          |
| EXTHIRST  | excessive thirst                 | severity* | 1 - 4 | = 1 if did not occur, = 2 if mild, = 3 if moderate, = 4 if severe                          |
| FATIGUE   | fatigue or low energy            | severity* | 1 - 4 | = 1 if did not occur, = 2 if mild, = 3 if moderate, = 4 if severe                          |
| FELT      | overall past two weeks           | felt*     | 1 - 5 |                                                                                            |
| HEADACHE  | headache                         | severity* | 1 - 4 | = 1 if did not occur, = 2 if mild, = 3 if moderate, = 4 if severe                          |
| ITCHYSKI  | itchy skin or hives              | severity* | 1 - 4 | = 1 if did not occur, = 2 if mild, = 3 if moderate, = 4 if severe                          |
| LITEHEAD  | lightheadedness when standing up | severity* | 1 - 4 | = 1 if did not occur, = 2 if mild, = 3 if moderate, = 4 if severe                          |
| NAUSEA    | nausea or upset stomach          | severity* | 1 - 4 | included in GI symptoms, = 1 if did not occur, = 2 if mild, = 3 if moderate, = 4 if severe |
| SERIOUS   | serious illness in past month    | yesnoft*  | 1 - 4 |                                                                                            |
| STUFFNOS  | stuffy nose                      | severity* | 1 - 4 | = 1 if did not occur, = 2 if mild, = 3 if moderate, = 4 if severe                          |
| TASTE     | change in taste                  | severity* | 1 - 4 | = 1 if did not occur, = 2 if mild, = 3 if moderate, = 4 if severe                          |
| VISIT     | visit                            | visittf*  | 4 - 8 | = 4 if SV3, = 5 if RI, = 6 if IFP 1, = 7 if IFP 2, = 8 if IFP 3                            |
| WHEEZING  | wheezing                         | severity* | 1 - 4 | = 1 if did not occur, = 2 if mild, = 3 if moderate, = 4 if severe                          |

\* custom format, see list of formats at end of this section.

---

**Variable Formats**

January 31, 2001

**DATASET: SIDEEFF**

| Dataset | Format:  | Value Range:    | Label:            |
|---------|----------|-----------------|-------------------|
| SIDEEFF | FELT     | ..              | NO ANSWER         |
|         |          | 1.              | MUCH WORSE        |
|         |          | 2.              | WORSE THAN USUAL  |
|         |          | 3.              | THE SAME AS USUAL |
|         |          | 4.              | BETTER THAN USUAL |
|         | SEVERITY | 5.              | MUCH BETTER       |
|         |          | ..              | NO ANSWER         |
|         |          | 1.              | DID NOT OCCUR     |
|         |          | 2.              | MILD              |
|         |          | 3.              | MODERATE          |
|         | VISITFT  | 4.              | SEVERE            |
|         |          | 1.              | PSV               |
|         |          | 2.              | SV1               |
|         |          | 3.              | SV2               |
|         |          | 4.              | SV3               |
| 5.      |          | RI              |                   |
| 6.      |          | INT1            |                   |
| 7.      |          | INT2            |                   |
| 8.      |          | INT3            |                   |
| YESNOFT | 9.       | COMPLT. FEEDING |                   |
|         | 0.       | No              |                   |
|         | 1.       | Yes             |                   |
|         | 2.       | No              |                   |
|         |          | 3.              | Unsure            |

---

SideEff Dataset 10 Sample Observations

1

|    |       | A | B | D | D | E |   | H | I | L |   | S |   | W |
|----|-------|---|---|---|---|---|---|---|---|---|---|---|---|---|
|    |       | P | L | C | I | R | X | F | E | T | I | S | T | H |
|    |       | P | O | O | A | Y | T | A | A | C | T | N | E | E |
|    | A     | E | A | N | R | M | H | T | D | H | E | A | R | F |
|    | N     | T | T | S | R | O | I | I | F | A | Y | H | U | I |
| O  | —     | I | I | T | H | U | R | G | E | C | S | E | S | O |
| b  | I     | T | N | I | E | T | S | U | L | H | K | A | E | U |
| s  | D     | E | G | P | A | H | T | E | T | E | I | D | A | S |
|    |       |   |   |   |   |   |   |   |   |   |   |   |   |   |
| 1  | 20847 | 1 | 1 | 1 | 1 | 1 | 1 | 1 | 3 | 1 | 1 | 1 | 2 | 1 |
| 2  | 20847 | 1 | 1 | 1 | 1 | 1 | 1 | 1 | 3 | 2 | 1 | 1 | 1 | 1 |
| 3  | 20847 | 1 | 2 | 1 | 1 | 2 | 1 | 1 | 5 | 1 | 1 | 1 | 2 | 1 |
| 4  | 20847 | 1 | 1 | 1 | 1 | 2 | 1 | 1 | 3 | 1 | 1 | 1 | 2 | 1 |
| 5  | 20847 | 1 | 1 | 1 | 1 | 1 | 1 | 1 | 3 | 1 | 1 | 1 | 2 | 1 |
| 6  | 10933 | 1 | 1 | 1 | 1 | 1 | 1 | 2 | 3 | 1 | 1 | 1 | 2 | 2 |
| 7  | 10933 | 2 | 2 | 2 | 2 | 2 | 3 | 2 | 3 | 1 | 2 | 1 | 2 | 3 |
| 8  | 10933 | 2 | 2 | 1 | 2 | 2 | 3 | 2 | 3 | 2 | 2 | 1 | 2 | 2 |
| 9  | 10933 | 3 | 2 | 3 | 3 | 2 | 2 | 2 | 3 | 3 | 2 | 3 | 3 | 2 |
| 10 | 10933 | 3 | 2 | 2 | 1 | 3 | 2 | 3 | 3 | 2 | 2 | 3 | 2 | 2 |

DASH-SODIUM Data Release (DTR-19)  
 PROGRAM: WLDTR1901.sas  
 ANALYST: W. Li -- Jan 31, 2001

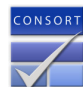

## CONSORT 2010 checklist of information to include when reporting a randomised trial\*

| Section/Topic                    | Item No | Checklist item                                                                                                                                                                              | Reported on page No       |
|----------------------------------|---------|---------------------------------------------------------------------------------------------------------------------------------------------------------------------------------------------|---------------------------|
| <b>Title and abstract</b>        |         |                                                                                                                                                                                             |                           |
|                                  | 1a      | Identification as a randomised trial in the title                                                                                                                                           | YES                       |
|                                  | 1b      | Structured summary of trial design, methods, results, and conclusions (for specific guidance see CONSORT for abstracts)                                                                     | YES                       |
| <b>Introduction</b>              |         |                                                                                                                                                                                             |                           |
| Background and objectives        | 2a      | Scientific background and explanation of rationale                                                                                                                                          | YES                       |
|                                  | 2b      | Specific objectives or hypotheses                                                                                                                                                           | YES                       |
| <b>Methods</b>                   |         |                                                                                                                                                                                             |                           |
| Trial design                     | 3a      | Description of trial design (such as parallel, factorial) including allocation ratio                                                                                                        | YES                       |
|                                  | 3b      | Important changes to methods after trial commencement (such as eligibility criteria), with reasons                                                                                          | YES                       |
| Participants                     | 4a      | Eligibility criteria for participants                                                                                                                                                       | YES                       |
|                                  | 4b      | Settings and locations where the data were collected                                                                                                                                        | YES                       |
| Interventions                    | 5       | The interventions for each group with sufficient details to allow replication, including how and when they were actually administered                                                       | YES                       |
| Outcomes                         | 6a      | Completely defined pre-specified primary and secondary outcome measures, including how and when they were assessed                                                                          | YES                       |
|                                  | 6b      | Any changes to trial outcomes after the trial commenced, with reasons                                                                                                                       | N/A                       |
| Sample size                      | 7a      | How sample size was determined                                                                                                                                                              | N/A (post-hoc analysis)   |
|                                  | 7b      | When applicable, explanation of any interim analyses and stopping guidelines                                                                                                                | N/A                       |
| <b>Randomisation:</b>            |         |                                                                                                                                                                                             |                           |
| Sequence generation              | 8a      | Method used to generate the random allocation sequence                                                                                                                                      | YES                       |
|                                  | 8b      | Type of randomisation; details of any restriction (such as blocking and block size)                                                                                                         | N/A                       |
| Allocation concealment mechanism | 9       | Mechanism used to implement the random allocation sequence (such as sequentially numbered containers), describing any steps taken to conceal the sequence until interventions were assigned | YES                       |
| Implementation                   | 10      | Who generated the random allocation sequence, who enrolled participants, and who assigned participants to interventions                                                                     | Coordinating center staff |
| Blinding                         | 11a     | If done, who was blinded after assignment to interventions (for example, participants, care providers, those                                                                                | Participants              |

## Manuscript: bmjopen-2014-006671

|                                                      |     |                                                                                                                                                   |                          |
|------------------------------------------------------|-----|---------------------------------------------------------------------------------------------------------------------------------------------------|--------------------------|
|                                                      |     | assessing outcomes) and how                                                                                                                       |                          |
|                                                      | 11b | If relevant, description of the similarity of interventions                                                                                       | YES                      |
| Statistical methods                                  | 12a | Statistical methods used to compare groups for primary and secondary outcomes                                                                     | YES                      |
|                                                      | 12b | Methods for additional analyses, such as subgroup analyses and adjusted analyses                                                                  | YES                      |
| <b>Results</b>                                       |     |                                                                                                                                                   |                          |
| Participant flow (a diagram is strongly recommended) | 13a | For each group, the numbers of participants who were randomly assigned, received intended treatment, and were analysed for the primary outcome    | YES. N/A for this study  |
|                                                      | 13b | For each group, losses and exclusions after randomisation, together with reasons                                                                  | YES                      |
| Recruitment                                          | 14a | Dates defining the periods of recruitment and follow-up                                                                                           | Time line not dates      |
|                                                      | 14b | Why the trial ended or was stopped                                                                                                                | Planned stopped          |
| Baseline data                                        | 15  | A table showing baseline demographic and clinical characteristics for each group                                                                  | YES                      |
| Numbers analysed                                     | 16  | For each group, number of participants (denominator) included in each analysis and whether the analysis was by original assigned groups           | YES                      |
| Outcomes and estimation                              | 17a | For each primary and secondary outcome, results for each group, and the estimated effect size and its precision (such as 95% confidence interval) | YES                      |
|                                                      | 17b | For binary outcomes, presentation of both absolute and relative effect sizes is recommended                                                       | Used Odds Ratio's        |
| Ancillary analyses                                   | 18  | Results of any other analyses performed, including subgroup analyses and adjusted analyses, distinguishing pre-specified from exploratory         | YES                      |
| Harms                                                | 19  | All important harms or unintended effects in each group (for specific guidance see CONSORT for harms)                                             | N/A in post hoc analysis |
| <b>Discussion</b>                                    |     |                                                                                                                                                   |                          |
| Limitations                                          | 20  | Trial limitations, addressing sources of potential bias, imprecision, and, if relevant, multiplicity of analyses                                  | YES                      |
| Generalisability                                     | 21  | Generalisability (external validity, applicability) of the trial findings                                                                         | YES                      |
| Interpretation                                       | 22  | Interpretation consistent with results, balancing benefits and harms, and considering other relevant evidence                                     | YES                      |
| <b>Other information</b>                             |     |                                                                                                                                                   |                          |
| Registration                                         | 23  | Registration number and name of trial registry                                                                                                    | YES                      |
| Protocol                                             | 24  | Where the full trial protocol can be accessed, if available                                                                                       | YES                      |
| Funding                                              | 25  | Sources of funding and other support (such as supply of drugs), role of funders                                                                   | YES                      |

\*We strongly recommend reading this statement in conjunction with the CONSORT 2010 Explanation and Elaboration for important clarifications on all the items. If relevant, we also recommend reading CONSORT extensions for cluster randomised trials, non-inferiority and equivalence trials, non-pharmacological treatments, herbal interventions, and pragmatic trials. Additional extensions are forthcoming: for those and for up to date references relevant to this checklist, see [www.consort-statement.org](http://www.consort-statement.org).
