# Supplementary material for: Effects of dietary sodium and the DASH diet on the occurrence of headaches: results from randomised multicentre DASH-Sodium clinical trial
Source: HighWire-hosted journal article supplement (doi:10.1136/bmjopen-2014-006671), 2014-12-01
Supplement: bmjopen-2014-006671supp.pdf [file bmjopen-2014-006671supp.pdf]

## Analysis Guide

January 31, 2001

### DATASET: SIDEEFF

Side effects (symptoms) data. One record per randomized participant per visit (collected at SV3, RI, IV1, IV2 and IV3). Use AN\_ID as the participant ID for all Data Release Requests and for all analysis data sets that leave CHR.

| Variable  | Description                      | Format    | Range | Notes                                                                                      |
|-----------|----------------------------------|-----------|-------|--------------------------------------------------------------------------------------------|
| AN_ID     | id for analysis datasets         | text      |       | Numeric portion of original alphanumeric ID. First digit identifies clinic site.           |
| APPETITE  | poor appetite                    | severity* | 1 - 4 | = 1 if did not occur, = 2 if mild, = 3 if moderate, = 4 if severe                          |
| BLOATING  | bloating / uncomfortably full    | severity* | 1 - 4 | included in GI symptoms, = 1 if did not occur, = 2 if mild, = 3 if moderate, = 4 if severe |
| CONSTIP   | constipation                     | severity* | 1 - 4 | included in GI symptoms, = 1 if did not occur, = 2 if mild, = 3 if moderate, = 4 if severe |
| DIARRHEA  | diarrhea / loose stools          | severity* | 1 - 4 | included in GI symptoms, = 1 if did not occur, = 2 if mild, = 3 if moderate, = 4 if severe |
| DRY MOUTH | dry mouth                        | severity* | 1 - 4 | = 1 if did not occur, = 2 if mild, = 3 if moderate, = 4 if severe                          |
| EXTHIRST  | excessive thirst                 | severity* | 1 - 4 | = 1 if did not occur, = 2 if mild, = 3 if moderate, = 4 if severe                          |
| FATIGUE   | fatigue or low energy            | severity* | 1 - 4 | = 1 if did not occur, = 2 if mild, = 3 if moderate, = 4 if severe                          |
| FELT      | overall past two weeks           | felt*     | 1 - 5 |                                                                                            |
| HEADACHE  | headache                         | severity* | 1 - 4 | = 1 if did not occur, = 2 if mild, = 3 if moderate, = 4 if severe                          |
| ITCHYSKI  | itchy skin or hives              | severity* | 1 - 4 | = 1 if did not occur, = 2 if mild, = 3 if moderate, = 4 if severe                          |
| LITEHEAD  | lightheadedness when standing up | severity* | 1 - 4 | = 1 if did not occur, = 2 if mild, = 3 if moderate, = 4 if severe                          |
| NAUSEA    | nausea or upset stomach          | severity* | 1 - 4 | included in GI symptoms, = 1 if did not occur, = 2 if mild, = 3 if moderate, = 4 if severe |
| SERIOUS   | serious illness in past month    | yesnoft*  | 1 - 4 |                                                                                            |
| STUFFNOS  | stuffy nose                      | severity* | 1 - 4 | = 1 if did not occur, = 2 if mild, = 3 if moderate, = 4 if severe                          |
| TASTE     | change in taste                  | severity* | 1 - 4 | = 1 if did not occur, = 2 if mild, = 3 if moderate, = 4 if severe                          |
| VISIT     | visit                            | visittf*  | 4 - 8 | = 4 if SV3, = 5 if RI, = 6 if IFP 1, = 7 if IFP 2, = 8 if IFP 3                            |
| WHEEZING  | wheezing                         | severity* | 1 - 4 | = 1 if did not occur, = 2 if mild, = 3 if moderate, = 4 if severe                          |

\* custom format, see list of formats at end of this section.

---

## Variable Formats

January 31, 2001

**DATASET:** SIDEEFF

| <b>Dataset</b> | <b>Format:</b> | <b>Value Range:</b> | <b>Label:</b>     |               |
|----------------|----------------|---------------------|-------------------|---------------|
| SIDEEFF        | FELT           | ..                  | NO ANSWER         |               |
|                |                | 1.                  | MUCH WORSE        |               |
|                |                | 2.                  | WORSE THAN USUAL  |               |
|                |                | 3.                  | THE SAME AS USUAL |               |
|                |                | 4.                  | BETTER THAN USUAL |               |
|                | SEVERITY       | SEVERITY            | 5.                | MUCH BETTER   |
|                |                |                     | ..                | NO ANSWER     |
|                |                |                     | 1.                | DID NOT OCCUR |
|                |                |                     | 2.                | MILD          |
|                | VISITFT        | VISITFT             | 3.                | MODERATE      |
|                |                |                     | 4.                | SEVERE        |
|                |                |                     | 1.                | PSV           |
|                |                |                     | 2.                | SV1           |
|                |                |                     | 3.                | SV2           |
|                |                |                     | 4.                | SV3           |
| 5.             |                |                     | RI                |               |
| YESNOFT        | YESNOFT        | 6.                  | INT1              |               |
|                |                | 7.                  | INT2              |               |
|                |                | 8.                  | INT3              |               |
|                |                | 9.                  | COMPLT. FEEDING   |               |
|                |                | 0.                  | No                |               |
|                |                | 1.                  | Yes               |               |
|                |                | 2.                  | No                |               |
|                |                | 3.                  | Unsure            |               |

---

SideEff Dataset 10 Sample Observations

1

|    |       | A | B | D | D | E |   | H | I | L |   | S |   | W |   |   |   |   |
|----|-------|---|---|---|---|---|---|---|---|---|---|---|---|---|---|---|---|---|
|    |       | P | L | C | I | R | X | F | E | T | I | S | T | H |   |   |   |   |
|    |       | P | O | O | A | Y | T | A | A | C | T | N | E | U |   |   |   |   |
|    | A     | E | A | N | R | M | H | T | D | H | E | A | R | F |   |   |   |   |
|    | N     | T | T | S | R | O | I | I | F | A | Y | H | U | I |   |   |   |   |
| O  |       | I | I | T | H | U | R | G | E | C | S | E | S | O |   |   |   |   |
| b  |       | T | N | I | E | T | S | U | L | H | K | A | E | U |   |   |   |   |
| s  | D     | E | G | P | A | H | T | E | T | E | I | D | A | S |   |   |   |   |
|    |       | S | S | E | T | G |   |   |   |   |   |   |   |   |   |   |   |   |
| 1  | 20847 | 1 | 1 | 1 | 1 | 1 | 1 | 1 | 3 | 1 | 1 | 1 | 1 | 2 | 1 | 1 | 4 | 1 |
| 2  | 20847 | 1 | 1 | 1 | 1 | 1 | 1 | 1 | 3 | 2 | 1 | 1 | 1 | 1 | 1 | 1 | 5 | 1 |
| 3  | 20847 | 1 | 2 | 1 | 1 | 2 | 1 | 1 | 5 | 1 | 1 | 1 | 1 | 2 | 1 | 1 | 6 | 1 |
| 4  | 20847 | 1 | 1 | 1 | 1 | 2 | 1 | 1 | 3 | 1 | 1 | 1 | 1 | 2 | 1 | 1 | 7 | 1 |
| 5  | 20847 | 1 | 1 | 1 | 1 | 1 | 1 | 1 | 3 | 1 | 1 | 1 | 1 | 2 | 1 | 1 | 8 | 1 |
| 6  | 10933 | 1 | 1 | 1 | 1 | 1 | 1 | 2 | 3 | 1 | 1 | 1 | 1 | 2 | 2 | 1 | 4 | 1 |
| 7  | 10933 | 2 | 2 | 2 | 2 | 2 | 3 | 2 | 3 | 1 | 2 | 1 | 1 | 2 | 3 | 1 | 5 | 1 |
| 8  | 10933 | 2 | 2 | 1 | 2 | 2 | 3 | 2 | 3 | 2 | 2 | 1 | 2 | 2 | 4 | 1 | 6 | 1 |
| 9  | 10933 | 3 | 2 | 3 | 3 | 2 | 2 | 2 | 3 | 3 | 2 | 3 | 3 | 2 | 3 | 1 | 7 | 2 |
| 10 | 10933 | 3 | 2 | 2 | 1 | 3 | 2 | 3 | 3 | 2 | 2 | 3 | 2 | 2 | 4 | 3 | 8 | 1 |

DASH-SODIUM Data Release (DTR-19)  
 PROGRAM: WLDTR1901.sas  
 ANALYST: W. Li -- Jan 31, 2001
